# Supplementary material for: Kin cell lysis is a danger signal that activates antibacterial pathways of Pseudomonas aeruginosa
Source: eLife. 2015 Feb 2;4:e05701. doi: 10.7554/eLife.05701 (PMC4348357; doi:10.7554/eLife.05701)
Supplement: Figure 7—source data 1. — Filtering criteria are described in ‘Materials and methods’. Mean and total spectral counts for the combined replicates are provided. Blue shading corresponds to Gac/Rsm targets as defined by Lory et al. (Goodman et al., 2004). DOI: http://dx.doi.org/10.7554/eLife.05701.023 [file elife05701s001.xlsx]

## Sheet: Proteome
	Spectral Counts
	Lysate		Control
Name	Mean	SD	Mean	SD	Log2 (Lysate/Control)	Total spectra
'PA2540'	3.66667	1.36626	0	0	N/D in Control	22
'PA0082'	7	1.26491	0	0	N/D in Control	42			=Gac/Rsm targets
'PA0277'	8.16667	3.0605	0.166667	0.408248	5.61471	50		N/D	not detected
'vgrG1'	8.16667	3.86868	0.5	0.83666	4.02975	52		SD	standard deviation
'PA0126'	4.66667	2.06559	0.333333	0.516398	3.80735	30
'PA3021'	4.16667	1.16905	0.333333	0.516398	3.64386	27
'clpV1'	28.8333	2.63944	2.66667	2.65832	3.43463	189
'PA4491'	4.83333	2.78687	0.5	0.83666	3.27302	32
'icmF1'	11.3333	1.8619	1.83333	1.7224	2.62803	79
'PA4317'	4	1.09545	1	1.26491	2	30
'PA5257'	3.33333	1.63299	0.833333	1.16905	2	25
'PA1069'	44.5	4.08656	11.6667	8.91441	1.93141	337
'PA0086'	5.83333	1.16905	1.66667	1.50555	1.80735	45
'PA3983'	2.83333	2.48328	0.833333	2.04124	1.76553	22
'nirS'	9.16667	3.12517	2.83333	2.48328	1.6939	72
'PA5441'	23	8.67179	7.5	4.46094	1.61667	183
'PA1791'	6	0.894427	2	0	1.58496	48
'ccpA'	2.5	1.87083	0.833333	2.04124	1.58496	20
'PA0084'	68.6667	10.4051	23.8333	6.91134	1.52663	555
'murE'	3.33333	2.94392	1.16667	1.60208	1.51457	27
'PA0079'	25.5	4.32435	9.33333	3.32666	1.45003	209
'PA4489'	16.3333	8.31064	6	3.74166	1.44478	134
'der'	5.33333	1.96638	2	1.09545	1.41504	44
'fbp'	8	3.2249	3	0.894427	1.41504	66
'gshA'	3.33333	1.50555	1.33333	1.0328	1.32193	28
'ihfA'	3.33333	1.75119	1.33333	1.0328	1.32193	28
'PA3729'	35.1667	3.92003	14.5	2.73861	1.27816	298
'hcp1'	18.5	3.27109	8.16667	2.13698	1.17971	160
'PA0083'	29.3333	9.9733	13	3.16228	1.17403	254
'PA0459'	9	4.85798	4	3.4641	1.16993	78
'PA3716'	40.6667	6.0553	18.1667	7.30525	1.16255	353
'PA3004'	8.16667	1.7224	3.66667	3.14113	1.15528	71
'PA3040'	9	3.57771	4.16667	3.65605	1.11103	79
'hisH2'	2.5	1.22474	1.16667	1.16905	1.09954	22
'PA0389'	2.83333	2.13698	1.33333	1.21106	1.08746	25
'hisF1'	2.83333	2.13698	1.33333	1.50555	1.08746	25
'hisH1'	2.83333	1.16905	1.33333	1.0328	1.08746	25
'mnmG'	3.16667	0.408248	1.5	1.04881	1.078	28
'PA5494'	4.16667	1.16905	2	1.26491	1.05889	37
'pilZ'	3.66667	0.516398	1.83333	2.04124	1	33
'bfr'	5.66667	1.75119	2.83333	3.25064	1	51
'PA3731'	10.1667	2.2286	5.16667	1.16905	0.976541	92
'fmt'	6.83333	1.47196	3.5	0.83666	0.965235	62
'zwf'	13.8333	6.99762	7.16667	2.13698	0.948775	126
'algR'	8.83333	4.57894	4.66667	2.16025	0.920566	81
'mliC'	7.16667	2.71416	3.83333	1.7224	0.902703	66
'rpmA'	7.16667	4.70815	3.83333	3.25064	0.902703	66
'ccoO2'	4	1.41421	2.16667	1.7224	0.884523	37
'PA0045'	3.66667	1.96638	2	1.41421	0.874469	34
'gpsA'	5.5	1.87083	3	1.26491	0.874469	51
'PA0937'	2.66667	1.50555	1.5	1.04881	0.830075	25
'PA3614'	2.66667	2.06559	1.5	1.76068	0.830075	25
'PA467316'	6.16667	4.02078	3.5	3.61939	0.817136	58
'PA4460'	8.16667	2.71416	4.66667	1.50555	0.807355	77
'PA1766'	5.5	2.66458	3.16667	2.63944	0.796467	52
'coq7'	5.16667	2.71416	3	0.894427	0.784271	49
'dnaA'	4	2.44949	2.33333	1.21106	0.777608	38
'PA0070'	60	7.69415	35.1667	7.38693	0.770754	571
'fliC'	59.8333	9.90791	35.6667	3.07679	0.746373	573
'PA5475'	2.5	1.04881	1.5	1.76068	0.736966	24
'lepB'	2.5	1.87083	1.5	1.04881	0.736966	24
'PA5343'	3.33333	1.75119	2	1.26491	0.736966	32
'parC'	5	3.09839	3	1.78885	0.736966	48
'PA2040'	3.83333	2.48328	2.33333	2.65832	0.716207	37
'PA4015'	6.83333	1.94079	4.16667	1.83485	0.713696	66
'amiE'	3	2.19089	1.83333	1.16905	0.710493	29
'moeA2'	3	2.52982	1.83333	0.983192	0.710493	29
'PA0858'	2.16667	1.60208	1.33333	2.06559	0.70044	21
'PA2973'	2.16667	1.94079	1.33333	1.21106	0.70044	21
'PA3664'	5.66667	1.75119	3.5	2.16795	0.695145	55
'ftsY'	9.66667	4.08248	6	2	0.688056	94
'pvdL'	9.83333	6.58534	6.16667	4.99667	0.67319	96
'PA5333'	4.5	2.50998	2.83333	2.63944	0.667425	44
'chpC'	4.5	5.20577	2.83333	2.92689	0.667425	44
'cheR1'	3.16667	1.47196	2	1.89737	0.662965	31
'iscA'	3.16667	0.752773	2	1.09545	0.662965	31
'lasR'	5	1.67332	3.16667	1.7224	0.658963	49
'PA2957'	3.66667	1.75119	2.33333	1.63299	0.652077	36
'PA0537'	16.5	2.88097	10.6667	3.26599	0.629357	163
'tgt'	2.83333	0.752773	1.83333	1.16905	0.628031	28
'ccoP2'	3.33333	3.38625	2.16667	2.40139	0.621488	33
'gph2'	3.33333	1.96638	2.16667	1.16905	0.621488	33
'pmbA'	3.83333	2.40139	2.5	1.3784	0.616671	38
'PA2204'	13	3.2249	8.5	1.51658	0.612977	129
'trpG'	5.33333	4.54606	3.5	4.1833	0.607683	53
'pncB1'	6.33333	1.21106	4.16667	1.47196	0.604071	63
'PA3732'	6.83333	2.04124	4.5	4.96991	0.602665	68
'PA4352'	20.6667	2.73252	13.6667	4.32049	0.596644	206
'PA5037'	13.8333	3.54495	9.16667	3.60093	0.59368	138
'apt'	2	1.09545	1.33333	1.50555	0.584963	20
'ppkA'	3.5	1.76068	2.33333	0.816497	0.584963	35
'PA1171'	4.5	1.3784	3	0.894427	0.584963	45
'atuF'	2	1.54919	1.33333	1.0328	0.584963	20
'nuoA2'	2	0	1.33333	0.516398	0.584963	20
'wspA'	2	2.44949	1.33333	2.33809	0.584963	20
'PA2871'	2.5	1.04881	1.66667	0.816497	0.584963	25
'osmE'	4.5	1.04881	3	1.09545	0.584963	45
'lipA'	5	1.67332	3.33333	1.63299	0.584963	50
'minC'	5	2.52982	3.33333	2.73252	0.584963	50
'rmlC'	11.8333	3.54495	8	1.41421	0.564785	119
'hisF2'	4.66667	2.06559	3.16667	2.04124	0.559427	47
'PA4474'	4.16667	1.60208	2.83333	2.2286	0.556393	42
'nqrC'	12	2.89828	8.16667	3.0605	0.555215	121
'betB'	16.8333	7.13909	11.5	3.14643	0.549687	170
'Six3'	2.66667	0.816497	1.83333	1.7224	0.540568	27
'nusB'	7.5	2.25832	5.16667	2.92689	0.537657	76
'rplT'	6	2.28035	4.16667	0.408248	0.526069	61
'secY'	5.5	2.07364	3.83333	1.16905	0.520832	56
'PA0428'	17.6667	11.5873	12.3333	4.08248	0.518467	180
'betI'	4.5	2.42899	3.16667	1.47196	0.50696	46
'PA3317'	2.83333	0.408248	2	0.632456	0.5025	29
'PA5291'	2.83333	0.408248	2	1.26491	0.5025	29
'PA1767'	8.66667	2.42212	6.16667	1.7224	0.490986	89
'trpC'	4.66667	1.50555	3.33333	0.816497	0.485427	48
'rlmN'	9	3.09839	6.5	1.51658	0.469485	93
'PA5178'	26.8333	6.11283	19.5	3.27109	0.460552	278
'erdR'	2.5	1.3784	1.83333	1.32916	0.447459	26
'proA'	18.1667	6.30608	13.3333	5.53775	0.446256	189
'adhA'	9.5	6.89202	7	5.54977	0.440573	99
'topA'	21.6667	2.94392	16	4.85798	0.437405	226
'gcvH1'	3.83333	2.40139	2.83333	1.32916	0.436099	40
'gcd'	7.66667	6.53197	5.66667	5.71548	0.436099	80
'PA4430'	9.16667	1.47196	6.83333	1.60208	0.423808	96
'PA5258'	14.5	2.88097	10.8333	1.94079	0.420576	152
'algU'	2	2	1.5	1.22474	0.415037	21
'ilvA1'	2	0.894427	1.5	0.83666	0.415037	21
'apeB'	2.66667	1.63299	2	2.19089	0.415037	28
'PA0259'	3.33333	1.96638	2.5	2.07364	0.415037	35
'rpoS'	3.33333	3.38625	2.5	1.3784	0.415037	35
'PA1440'	4	2.19089	3	1.67332	0.415037	42
'PA0141'	5.33333	1.63299	4	2.52982	0.415037	56
'fur'	9.33333	0.816497	7	2.82843	0.415037	98
'rapA'	14.6667	3.88158	11	2.60768	0.415037	154
'ppiA'	11	3.34664	8.33333	2.80476	0.400538	116
'oprG'	10.3333	8.11583	7.83333	8.72735	0.399607	109
'PA5508'	3.5	2.58844	2.66667	1.96638	0.392317	37
'dapB'	19	4.81664	14.5	3.14643	0.389947	201
'hslV'	2.83333	0.752773	2.16667	0.752773	0.387023	30
'narH'	2.83333	0.752773	2.16667	0.408248	0.387023	30
'PA1159'	15	2.82843	11.5	2.88097	0.383329	159
'cbpD'	14.3333	12.801	11	8.12404	0.381871	152
'phoU'	2.16667	0.408248	1.66667	0.816497	0.378512	23
'PA0429'	4.33333	1.21106	3.33333	1.36626	0.378512	46
'pvdD'	6.5	3.67423	5	1.78885	0.378512	69
'PA2412'	7.33333	2.16025	5.66667	1.36626	0.371969	78
'wbpM'	5.16667	2.56255	4	2.36643	0.369234	55
'PA5062'	3	1.67332	2.33333	2.73252	0.36257	32
'gbcA'	3	2.82843	2.33333	1.75119	0.36257	32
'xthA'	4.5	0.547723	3.5	1.51658	0.36257	48
'rplM'	40.6667	18.3485	31.6667	5.57375	0.360882	434
'fklB'	9.83333	4.11906	7.66667	2.06559	0.359081	105
'aotO'	5.33333	1.96638	4.16667	0.752773	0.356144	57
'mqo1'	10.6667	2.65832	8.33333	4.13118	0.356144	114
'arcA'	69.3333	7.36659	54.3333	19.3149	0.351712	742
'PA3659'	4.66667	3.6697	3.66667	1.63299	0.347923	50
'nosZ'	4.66667	5.27889	3.66667	3.50238	0.347923	50
'kynA'	8.66667	1.75119	6.83333	2.04124	0.342888	93
'PA4429'	38.6667	9.09212	30.5	3.39116	0.342281	415
'hslO'	3.16667	2.85774	2.5	2.25832	0.341037	34
'xpt'	10.3333	1.50555	8.16667	2.04124	0.339486	111
'PA5422'	4	2.89828	3.16667	1.94079	0.337035	43
'dapF'	4.83333	1.7224	3.83333	2.31661	0.334419	52
'opgH'	4.83333	2.78687	3.83333	3.3116	0.334419	52
'PA5146'	17	3.09839	13.5	2.88097	0.332575	183
'fabZ'	15.5	2.58844	12.3333	1.36626	0.329705	167
'murD'	9	2.19089	7.16667	2.63944	0.328623	97
'folC'	3.33333	1.63299	2.66667	1.50555	0.321928	36
'relA'	3.33333	1.8619	2.66667	1.21106	0.321928	36
'PA3808'	2.5	0.547723	2	0	0.321928	27
'PA5190'	2.5	1.87083	2	2.28035	0.321928	27
'PA3019'	4.16667	2.04124	3.33333	1.63299	0.321928	45
'PA2823'	5.83333	2.31661	4.66667	1.75119	0.321928	63
'gshB'	8.33333	2.25093	6.66667	2.33809	0.321928	90
'PA0387'	11	4.14729	8.83333	3.0605	0.316474	119
'PA4701'	44	3.68782	35.3333	5.39135	0.316474	476
'phhB'	27.5	2.88097	22.1667	8.97589	0.31104	298
'PA4079'	5.16667	2.2286	4.16667	1.94079	0.31034	56
'imm2'	5.16667	2.13698	4.16667	1.32916	0.31034	56
'tonB'	5.16667	1.60208	4.16667	0.752773	0.31034	56
'rph'	8.66667	5.35413	7	4	0.308122	94
'gmk'	3.5	1.04881	2.83333	1.16905	0.304855	38
'PA4963'	7	4	5.66667	2.06559	0.304855	76
'pvdH'	23	17.8662	18.6667	14.6652	0.30117	250
'yidC'	16.1667	1.83485	13.1667	2.78687	0.296132	176
'PA3256'	1.83333	1.47196	1.5	1.3784	0.289507	20
'PA1520'	4.66667	1.36626	3.83333	0.752773	0.283793	51
'PA4928'	2.83333	3.25064	2.33333	2.06559	0.280108	31
'PA3785'	3.83333	2.92689	3.16667	1.47196	0.275634	42
'ccoN1'	8.66667	1.63299	7.16667	1.47196	0.274175	95
'nuoC'	21.3333	1.96638	17.6667	3.32666	0.27208	234
'hisS'	16.6667	7.31209	13.8333	3.3116	0.268817	183
'PA5108'	2	0	1.66667	0.516398	0.263034	22
'PA3641'	3	0.632456	2.5	1.97484	0.263034	33
'alkT'	3	2.09762	2.5	1.87083	0.263034	33
'spuI'	25.8333	11.089	21.6667	11.8771	0.253757	285
'wbpA'	60.5	1.97484	50.8333	6.99762	0.25116	668
'arnA'	13.6667	9.56382	11.5	7.86766	0.249028	151
'secB'	26.5	2.16795	22.3333	2.94392	0.246794	293
'rpsN'	8.5	3.50714	7.16667	4.07022	0.246161	94
'lnt'	5.33333	1.0328	4.5	2.07364	0.245112	59
'rpsK'	38.3333	7.25718	32.5	4.63681	0.23816	425
'lptF'	34	4.73286	28.8333	3.86868	0.237797	377
'PA4632'	21	2.44949	17.8333	2.40139	0.235813	233
'PA5005'	38.8333	5.6006	33	7.37564	0.23483	431
'PA2765'	14.5	2.07364	12.3333	1.75119	0.23349	161
'ispB'	15.6667	1.21106	13.3333	2.42212	0.232661	174
'PA4394'	4.5	1.76068	3.83333	2.63944	0.231326	50
'PA5436'	13.5	3.27109	11.5	2.42899	0.231326	150
'kdsA'	36.1667	4.30891	30.8333	7.9854	0.23017	402
'fabG'	34.1667	4.40076	29.1667	3.86868	0.228269	380
'rpsO'	13.8333	6.76511	11.8333	3.86868	0.225292	154
'hslU'	15	3.79473	12.8333	1.7224	0.225067	167
'rnr'	16.1667	9.19601	13.8333	9.80646	0.224873	180
'PA1646'	2.33333	0.516398	2	0	0.222392	26
'metY'	3.5	3.72827	3	3.34664	0.222392	39
'katB'	13	3.03315	11.1667	3.97073	0.219313	145
'PA0950'	11.8333	1.47196	10.1667	1.7224	0.21901	132
'PA2111'	9.5	5.24404	8.16667	4.99667	0.21818	106
'PA0596'	10.8333	5.26941	9.33333	4.96655	0.215013	121
'PA3533'	21.6667	4.50185	18.6667	2.42212	0.215013	242
'arnB'	4.83333	3.76386	4.16667	3.54495	0.214125	54
'hupB'	78.6667	19.2631	67.8333	13.6736	0.213758	879
'PA2575'	13.3333	2.65832	11.5	3.33167	0.213404	149
'glnA'	47.3333	9.60555	40.8333	1.94079	0.213109	529
'argB'	15.8333	4.44597	13.6667	3.14113	0.212304	177
'PA1837'	19.5	5.61249	16.8333	5.63619	0.212153	218
'pigA'	7.33333	1.0328	6.33333	2.42212	0.211504	82
'icmP'	57.6667	9.0037	49.8333	4.83391	0.210627	645
'rne'	77.6667	13.2162	67.1667	4.79236	0.20955	869
'iscU'	12.3333	7.58068	10.6667	4.63321	0.209453	138
'PA0371'	2.5	1.3784	2.16667	1.32916	0.206451	28
'PA0900'	2.5	0.547723	2.16667	1.16905	0.206451	28
'PA3967'	2.5	0.547723	2.16667	0.408248	0.206451	28
'ttcA'	2.5	1.64317	2.16667	0.752773	0.206451	28
'dadA1'	15.1667	4.75044	13.1667	3.76386	0.204014	170
'gap'	15.1667	3.25064	13.1667	2.78687	0.204014	170
'PA4456'	6.33333	6.21825	5.5	4.1833	0.203533	71
'lolA'	10.1667	2.56255	8.83333	2.31661	0.202817	114
'rbsK'	7.66667	1.8619	6.66667	2.94392	0.201634	86
'wbpG'	7.66667	2.80476	6.66667	4.54606	0.201634	86
'glmS'	16.6667	3.4448	14.5	7.47663	0.200913	187
'braF'	10.3333	1.8619	9	3.89872	0.199309	116
'oprE'	19.5	2.73861	17	1.67332	0.197939	219
'cc4'	24.8333	2.85774	21.6667	2.80476	0.196801	279
'clpX'	49	4.24264	42.8333	4.70815	0.194048	551
'PA1076'	2.66667	2.16025	2.33333	1.75119	0.192645	30
'PA3081'	2.66667	2.42212	2.33333	2.25093	0.192645	30
'PA5305'	2.66667	1.50555	2.33333	1.50555	0.192645	30
'liuE'	2.66667	0.816497	2.33333	0.816497	0.192645	30
'PA1654'	4	1.41421	3.5	1.76068	0.192645	45
'ohr'	4	1.41421	3.5	1.22474	0.192645	45
'PA1768'	5.33333	1.63299	4.66667	1.96638	0.192645	60
'bcp'	6.66667	1.63299	5.83333	0.752773	0.192645	75
'nuoB'	9.33333	1.96638	8.16667	1.83485	0.192645	105
'rho'	50.8333	6.08002	44.5	1.64317	0.19197	572
'serC'	24.3333	2.42212	21.3333	4.08248	0.189825	274
'PA2813'	9.5	1.64317	8.33333	2.25093	0.189034	107
'nrdB'	49.1667	3.76386	43.1667	3.37145	0.187763	554
'dadX'	6.83333	2.2286	6	1.41421	0.187627	77
'ppk'	16.5	3.39116	14.5	4.08656	0.186413	186
'PA2659'	9.66667	1.21106	8.5	2.07364	0.185556	109
'adhC'	14	4.5607	12.3333	6.28225	0.182864	158
'PA2971'	2.83333	1.16905	2.5	2.34521	0.180572	32
'fimL'	2.83333	2.13698	2.5	1.64317	0.180572	32
'leuC'	2.83333	0.408248	2.5	1.04881	0.180572	32
'gcvH2'	5.66667	3.38625	5	2.09762	0.180572	64
'mvaT'	26	6.9857	23	5.62139	0.176878	294
'pckA'	61	4.97996	54	3.94968	0.17585	690
'PA0920'	7.33333	2.06559	6.5	2.34521	0.174029	83
'PA2980'	8.83333	0.983192	7.83333	1.60208	0.173332	100
'PA3768'	3	1.41421	2.66667	1.36626	0.169925	34
'PA4615'	4.5	1.04881	4	2.19089	0.169925	51
'mscL'	4.5	2.07364	4	2.96648	0.169925	51
'ftsH'	31.5	5.24404	28	2.36643	0.169925	357
'surA'	36.3333	1.75119	32.3333	5.27889	0.168271	412
'metF'	16.6667	5.16398	14.8333	3.97073	0.168123	189
'PA4458'	7.66667	2.42212	6.83333	1.7224	0.16601	87
'fabA'	7.66667	1.63299	6.83333	1.16905	0.16601	87
'rpsM'	37.1667	1.94079	33.1667	2.56255	0.164275	422
'map'	29.5	2.81069	26.3333	1.50555	0.163825	335
'PA3309'	37.3333	1.36626	33.3333	3.01109	0.163499	424
'tktA'	65.3333	9.13601	58.3333	9.79115	0.163499	742
'purB'	46.8333	2.56255	41.8333	3.18852	0.162883	532
'pilA'	31.3333	13.2464	28	5.72713	0.162271	356
'gltX'	34.5	8.59651	30.8333	9.9482	0.162105	392
'PA2323'	11	4.60435	9.83333	5.81091	0.161751	125
'algP'	11	2.52982	9.83333	4.21505	0.161751	125
'rplW'	17.3333	3.14113	15.5	2.07364	0.161281	197
'ilvE'	20.5	3.83406	18.3333	4.27395	0.161155	233
'purH'	33.6667	7.33939	30.1667	5.98052	0.158366	383
'ccoO1'	24.1667	3.71035	21.6667	2.42212	0.157541	275
'rplB'	68	18.3848	61	11.8152	0.156726	774
'nqrA'	26.3333	3.07679	23.6667	2.58199	0.154034	300
'PA2634'	25.1667	5.49242	22.6667	6.97615	0.150942	287
'secD'	30.3333	4.50185	27.3333	2.58199	0.150243	346
'aceE'	133.167	7.93515	120	5.09902	0.150199	1519
'aspS'	59.5	7.06399	53.6667	4.76095	0.148863	679
'metK'	54.5	9.64883	49.1667	5.49242	0.148576	622
'accD'	15.3333	3.26599	13.8333	3.0605	0.148523	175
'prfC'	13.6667	1.0328	12.3333	3.26599	0.148099	156
'mucD'	23	4.09878	20.8333	4.70815	0.14274	263
'PA1833'	17.8333	1.94079	16.1667	1.60208	0.141554	204
'azu'	60.6667	6.68331	55	4	0.141472	694
'PA0400'	52.1667	9.26103	47.3333	16.5972	0.140272	597
'cheW'	18	5.25357	16.3333	3.26599	0.140178	206
'sdhA'	110.167	11.1788	100	6.69328	0.139688	1261
'rpsQ'	12.6667	3.01109	11.5	1.04881	0.139403	145
'rnk'	20	5.25357	18.1667	2.99444	0.138706	229
'rsmA'	3.66667	0.816497	3.33333	0.516398	0.137504	42
'PA5301'	5.5	3.83406	5	2.96648	0.137504	63
'hemC'	9.16667	2.99444	8.33333	1.8619	0.137504	105
'PA2828'	11	2	10	3.40588	0.137504	126
'bamE'	16.5	1.64317	15	3.63318	0.137504	189
'PA0456'	22.1667	2.99444	20.1667	1.47196	0.136419	254
'ccoP1'	35.3333	2.06559	32.1667	3.65605	0.135463	405
'PA2812'	7.5	1.87083	6.83333	1.60208	0.134301	86
'PA3349'	7.5	1.87083	6.83333	3.76386	0.134301	86
'fdnG'	7.5	2.66458	6.83333	3.71035	0.134301	86
'PA3286'	15	3.09839	13.6667	1.50555	0.134301	172
'cbrB'	22.5	5.31977	20.5	2.88097	0.134301	258
'pgi'	9.5	2.42899	8.66667	0.816497	0.13245	109
'dnaK'	168	12.7906	153.333	7.63326	0.13179	1928
'PA2760'	7.66667	4.80278	7	5.51362	0.131245	88
'nadC'	7.66667	0.816497	7	1.89737	0.131245	88
'PA0506'	19.1667	2.63944	17.5	2.16795	0.131245	220
'sdhB'	38.6667	2.65832	35.3333	1.63299	0.130061	444
'PA4495'	17.5	2.07364	16	2	0.129283	201
'katA'	29.1667	14.9989	26.6667	10.8012	0.129283	335
'guaB'	68.6667	5.00666	62.8333	4.79236	0.12808	789
'ppsA'	79.3333	10.8382	72.6667	4.63321	0.126633	912
'PA3794'	2	0	1.83333	0.983192	0.125531	23
'pdxH'	2	2.28035	1.83333	1.7224	0.125531	23
'amn'	4	2.28035	3.66667	0.816497	0.125531	46
'PA3712'	6	1.41421	5.5	1.87083	0.125531	69
'PA4163'	8	2.75681	7.33333	2.87518	0.125531	92
'gcvT'	12	5.17687	11	5.51362	0.125531	138
'ftsZ'	36.6667	6.25033	33.6667	1.96638	0.123148	422
'rpsI'	16.3333	1.8619	15	2.44949	0.122857	188
'hflC'	14.3333	2.06559	13.1667	2.71416	0.122484	165
'PA0604'	10.3333	2.25093	9.5	2.42899	0.121306	119
'gpmI'	27	4.85798	24.8333	4.66548	0.120681	311
'PA0399'	16.6667	5.88784	15.3333	3.4448	0.120294	192
'nadE'	25.1667	3.54495	23.1667	3.54495	0.119464	290
'rpsU'	40	3.16228	36.8333	4.40076	0.118988	461
'rpmD'	8.5	5.54076	7.83333	6.49359	0.117836	98
'sspA'	8.5	4.84768	7.83333	4.07022	0.117836	98
'PA3313'	27.6667	4.17931	25.5	2.94958	0.117652	319
'purF'	25.8333	4.26224	23.8333	3.86868	0.116253	298
'trpD'	2.16667	2.31661	2	1.26491	0.115477	25
'qor'	4.33333	2.42212	4	2.60768	0.115477	50
'PA2552'	8.66667	2.33809	8	3.03315	0.115477	100
'PA2402'	15.1667	6.08002	14	4.38178	0.115477	175
'htpG'	128.833	10.7595	119	19.1311	0.114544	1487
'PA4842'	17.5	2.66458	16.1667	5.15429	0.114333	202
'cysP'	15.5	4.59347	14.3333	2.16025	0.112894	179
'PA5396'	6.66667	2.25093	6.16667	1.16905	0.112475	77
'arcB'	85.3333	8.50098	79	18.0776	0.111257	986
'pcm'	4.5	1.04881	4.16667	1.16905	0.111031	52
'rmlA'	13.5	3.14643	12.5	3.33167	0.111031	156
'rpoB'	256.333	17.9629	237.5	11.3974	0.110094	2963
'rpmG'	6.83333	2.31661	6.33333	1.8619	0.109624	79
'spoOJ'	22.8333	3.43026	21.1667	4.21505	0.109347	264
'dapD'	20.8333	4.16733	19.3333	2.50333	0.107803	241
'PA5252'	2.33333	1.8619	2.16667	1.7224	0.106915	27
'PA2582'	11.6667	1.21106	10.8333	1.16905	0.106915	135
'putA'	46.8333	10.5151	43.5	7.66159	0.10652	542
'gyrA'	37.5	4.67974	34.8333	2.48328	0.106422	434
'wbpB'	23.5	2.81069	21.8333	3.25064	0.106128	272
'glmU'	11.8333	2.40139	11	1.67332	0.105353	137
'parE'	4.83333	2.48328	4.5	2.88097	0.103093	56
'groS'	87.1667	17.9713	81.1667	14.784	0.102889	1010
'carB'	92.6667	3.93277	86.3333	4.54606	0.102133	1074
'lpxC'	29.8333	4.57894	27.8333	4.11906	0.100111	346
'PA4960'	2.5	1.87083	2.33333	1.21106	0.0995357	29
'hisC2'	2.5	2.25832	2.33333	2.33809	0.0995357	29
'murG'	2.5	1.64317	2.33333	1.50555	0.0995357	29
'ubiG'	10	0.894427	9.33333	1.21106	0.0995357	116
'argH'	15	3.28634	14	2.75681	0.0995357	174
'ftsA'	30	3.4641	28	4.3359	0.0995357	348
'phaF'	35	2	32.6667	4.76095	0.0995357	406
'PA1342'	100	6.60303	93.3333	9.0701	0.0995357	1160
'arcC'	15.1667	1.16905	14.1667	3.43026	0.0984037	176
'idh'	124	13.3267	115.833	12.0899	0.0982896	1439
'PA5076'	40.8333	4.75044	38.1667	3.86868	0.0974342	474
'PA1574'	7.66667	3.07679	7.16667	1.32916	0.0972972	89
'acpP1'	23	0.894427	21.5	1.04881	0.0972972	267
'infB'	115.333	6.47045	107.833	5.67157	0.0970063	1339
'pvdF'	7.83333	3.86868	7.33333	3.55903	0.0951572	91
'panB2'	26.3333	2.73252	24.6667	3.4448	0.0943274	306
'PA0542'	2.66667	0.516398	2.5	0.547723	0.0931094	31
'ppiC2'	16.1667	2.2286	15.1667	2.92689	0.0921182	188
'cysI'	32.8333	5.03653	30.8333	5.87934	0.0906704	382
'nrdA'	99.3333	8.59457	93.3333	4.36654	0.0898855	1156
'rpsE'	64.3333	16.3054	60.5	7.09225	0.0886313	749
'PA3496'	2.83333	0.408248	2.66667	0.516398	0.0874628	33
'PA5167'	25.5	7.86766	24	6.13188	0.0874628	297
'ltaE'	17.1667	2.2286	16.1667	1.60208	0.0865877	200
'glyS'	34.5	4.59347	32.5	1.97484	0.0861566	402
'infA'	17.3333	2.42212	16.3333	1.96638	0.0857299	202
'purL'	52	8.31865	49	6.87023	0.0857299	606
'ilvD'	17.5	2.25832	16.5	2.07364	0.0848889	204
'PA5312'	58.6667	5.04645	55.3333	10.0929	0.0843922	684
'rplL'	158.667	53.3317	149.667	40.3121	0.0842461	1850
'rplP'	35.3333	3.9833	33.3333	2.42212	0.0840643	412
'eno'	70.6667	3.82971	66.6667	2.65832	0.0840643	824
'gdhB'	178.333	2.58199	168.333	12.7541	0.0832555	2080
'PA2797'	3	0	2.83333	0.408248	0.0824622	35
'amgR'	3	1.26491	2.83333	1.60208	0.0824622	35
'aotQ'	3	1.26491	2.83333	0.408248	0.0824622	35
'argC'	6	2.96648	5.66667	1.50555	0.0824622	70
'fpr'	40	1.54919	37.8333	1.94079	0.0803421	467
'PA1339'	6.16667	1.94079	5.83333	2.71416	0.0801703	72
'PA4639'	24.6667	3.01109	23.3333	2.65832	0.0801703	288
'pmpR'	9.33333	3.38625	8.83333	1.94079	0.0794345	109
'wbpI'	28	2.44949	26.5	4.1833	0.0794345	327
'rpmE'	34.3333	2.16025	32.5	3.67423	0.0791702	401
'maeA'	25.1667	2.63944	23.8333	2.99444	0.0785334	294
'PA1340'	3.16667	0.983192	3	0	0.0780025	37
'trkA'	3.16667	1.83485	3	1.78885	0.0780025	37
'pal'	19.1667	1.16905	18.1667	2.78687	0.0773057	224
'PA4199'	9.66667	2.73252	9.16667	2.31661	0.0766213	113
'thrC'	26	2.36643	24.6667	4.2269	0.0759489	304
'hutU'	3.33333	2.87518	3.16667	2.99444	0.0740006	39
'rplR'	26.6667	3.07679	25.3333	1.36626	0.0740006	312
'rplO'	26.8333	4.66548	25.5	2.94958	0.073529	314
'PA4645'	10.1667	1.60208	9.66667	1.63299	0.0727563	119
'mexF'	72	5.86515	68.5	3.27109	0.0718929	843
'ubiE'	27.6667	6.15359	26.3333	2.80476	0.0712587	324
'argS'	41.6667	4.67618	39.6667	5.60952	0.0709665	488
'trmA'	3.5	3.56371	3.33333	2.06559	0.0703893	41
'tpx'	42.1667	4.11906	40.1667	5.26941	0.0701042	494
'mexB'	7.16667	1.7224	6.83333	1.7224	0.0687128	84
'pnp'	154.333	15.5134	147.167	10.8704	0.0685988	1809
'ileS'	54.6667	7.94145	52.1667	3.18852	0.0675332	641
'leuS'	51.1667	9.66264	48.8333	13.2577	0.067338	600
'PA3440'	7.33333	0.516398	7	0.632456	0.0671142	86
'aspC'	48.1667	6.61564	46	5.83095	0.0664012	565
'bamB'	18.6667	2.73252	17.8333	3.43026	0.0658879	219
'groL'	586.833	61.7751	560.667	46.796	0.0658075	6885
'rpoC'	266.167	13.4969	254.333	10.9301	0.0656094	3123
'rpsJ'	30	2.96648	28.6667	1.63299	0.0655883	352
'prfA'	3.83333	1.32916	3.66667	3.14113	0.0641303	45
'etfB'	65.5	5.61249	62.6667	6.77249	0.0637967	769
'purA'	70	9.05539	67	8.60233	0.0631938	822
'acnB'	212	13.5351	203	15.0997	0.0625845	2490
'clpP1'	15.8333	1.7224	15.1667	1.7224	0.062061	186
'ddlB'	4	1.26491	3.83333	1.94079	0.0614005	47
'PA4675'	8	5.54977	7.66667	7.65942	0.0614005	94
'hscA'	8	3.94968	7.66667	3.26599	0.0614005	94
'dcd'	12	3.52136	11.5	1.76068	0.0614005	141
'rdgC'	36.1667	2.85774	34.6667	2.42212	0.0611115	425
'sodB'	28.1667	9.19601	27	9.93982	0.0610294	331
'pvdA'	40.3333	6.0553	38.6667	11.2368	0.0608822	474
'PA0388'	8.16667	0.983192	7.83333	2.04124	0.060121	96
'murA'	28.6667	5.95539	27.5	1.51658	0.0599425	337
'cheA'	12.3333	3.38625	11.8333	2.78687	0.0597062	145
'PA4431'	24.6667	1.50555	23.6667	2.87518	0.0597062	290
'rpsG'	58	8.39047	55.6667	5.95539	0.0592392	682
'atpA'	120.5	11.2739	115.667	4.54606	0.05906	1417
'pvdO'	4.16667	3.18852	4	3.09839	0.0588937	49
'cheB1'	8.33333	1.63299	8	2	0.0588937	98
'trpS'	25.8333	6.04704	24.8333	4.40076	0.0569559	304
'PA5201'	47.5	3.83406	45.6667	6.7429	0.056786	559
'tolQ'	13	1.41421	12.5	1.3784	0.0565835	153
'pyrF'	4.33333	1.63299	4.16667	1.94079	0.0565835	51
'dapA'	40.6667	2.65832	39.1667	4.75044	0.0542204	479
'PA3647'	14	2.96648	13.5	1.3784	0.0524674	165
'rpmC'	32.6667	4.50185	31.5	2.50998	0.0524674	385
'rpsC'	93.3333	6.80196	90	8.7178	0.0524674	1100
'lpdG'	32.8333	3.25064	31.6667	3.20416	0.0521962	387
'PA0460'	14.1667	1.94079	13.6667	0.816497	0.0518389	167
'dnaE'	14.6667	1.0328	14.1667	3.18852	0.0500407	173
'ahcY'	59.1667	4.49073	57.1667	3.54495	0.0496104	698
'dnaN'	39.6667	1.75119	38.3333	4.88535	0.0493277	468
'PA2843'	5	1.67332	4.83333	1.32916	0.0489096	59
'glpD'	5	3.52136	4.83333	2.85774	0.0489096	59
'rpsF'	61	5.76194	59	2.52982	0.0480943	720
'frr'	30.6667	3.38625	29.6667	1.50555	0.0478285	362
'PA0335'	5.16667	1.83485	5	2.96648	0.0473057	61
'PA5046'	106	9.31665	102.667	5.92171	0.0460964	1252
'alaS'	53.6667	2.94392	52	4.19524	0.0455147	634
'atpC'	10.8333	2.48328	10.5	2.16795	0.0450879	128
'tpiA'	11	3.79473	10.6667	6.50128	0.0443941	130
'PA3173'	11.1667	0.752773	10.8333	1.47196	0.0437214	132
'dnaJ'	16.8333	2.56255	16.3333	1.8619	0.0435016	199
'PA2707'	5.66667	2.06559	5.5	0.83666	0.0430687	67
'dsbC'	11.3333	1.36626	11	1.26491	0.0430687	134
'gcdH'	40.6667	5.20256	39.5	3.78153	0.0419941	481
'PA1969'	5.83333	0.752773	5.66667	1.96638	0.0418202	69
'phhC'	76.1667	8.01041	74	8.31865	0.0416345	901
'hldE'	17.6667	3.7238	17.1667	2.99444	0.0414199	209
'hisC1'	6	1.26491	5.83333	0.983192	0.040642	71
'ssb'	12	1.78885	11.6667	2.50333	0.040642	142
'orf2'	6.16667	2.85774	6	1.89737	0.0395284	73
'pvdJ'	6.16667	4.44597	6	6.51153	0.0395284	73
'PA3940'	25.3333	2.80476	24.6667	1.75119	0.0384741	300
'secA'	77.8333	8.32867	75.8333	8.95358	0.037556	922
'tig'	153.167	16.3024	149.333	9.7091	0.0365661	1815
'lysC'	27.6667	3.9833	27	5.54977	0.0351894	328
'rpsL'	41.5	11.7431	40.5	7.66159	0.0351894	492
'PA2110'	7	1.26491	6.83333	2.78687	0.0347654	83
'mqo2'	35.3333	5.24087	34.5	4.50555	0.0344335	419
'pctB'	7.16667	3.43026	7	0.894427	0.0339473	85
'edd'	21.5	2.42899	21	6.69328	0.0339473	255
'rplQ'	52.3333	3.14113	51.1667	13.5561	0.0325259	621
'pyrC'	15	1.67332	14.6667	2.50333	0.0324215	178
'fba'	37.5	2.58844	36.6667	1.96638	0.0324215	445
'rpoD'	53.3333	7.78888	52.1667	5.91326	0.0319092	633
'hemB'	23	4.81664	22.5	4.37035	0.0317089	273
'PA0745'	23.5	4.1833	23	3.89872	0.0310269	279
'PA2950'	31.3333	2.25093	30.6667	4.54606	0.0310269	372
'PA0833'	8.16667	2.04124	8	2.19089	0.0297473	97
'PA0962'	16.5	4.46094	16.1667	1.7224	0.0294438	196
'PA4441'	25.3333	1.8619	24.8333	4.26224	0.028759	301
'PA5339'	50.8333	5.45588	49.8333	3.43026	0.0286638	604
'carA'	25.8333	3.60093	25.3333	6.56252	0.0281969	307
'gyrB'	60.5	3.44964	59.3333	6.43946	0.0280923	719
'PA2667'	8.66667	2.25093	8.5	1.04881	0.0280144	103
'PA1772'	8.83333	0.408248	8.66667	1.75119	0.0274807	105
'PA4642'	8.83333	1.32916	8.66667	0.816497	0.0274807	105
'PA4461'	18.1667	5.84523	17.8333	3.43026	0.0267173	216
'pheT'	27.5	5.31977	27	3.52136	0.0264722	327
'lptD'	19.3333	8.82421	19	11.349	0.025091	230
'liuD'	21.6667	6.59293	21.3333	5.24087	0.0223678	258
'mreB'	54.6667	4.88535	53.8333	4.62241	0.0221616	651
'astA'	11.3333	3.07679	11.1667	4.70815	0.0213737	135
'PA5245'	22.6667	5.78504	22.3333	3.88158	0.0213737	270
'mexE'	103	5.93296	101.5	4.84768	0.0211646	1227
'sthA'	35.3333	3.01109	34.8333	1.83485	0.0205613	421
'PA1750'	12.5	2.66458	12.3333	3.6697	0.0193653	149
'purK'	13	1.09545	12.8333	1.16905	0.0186157	155
'atpD'	185.333	6.47045	183	8.07465	0.0182787	2210
'argJ'	26.5	2.58844	26.1667	3.71035	0.0182622	316
'metZ'	13.5	1.87083	13.3333	2.73252	0.0179219	161
'hflK'	28.8333	6.11283	28.5	7.50333	0.0167757	344
'liuC'	16.1667	2.04124	16	4.73286	0.0149503	193
'nusG'	32.3333	6.15359	32	4.5607	0.0149503	386
'cysNC'	17.6667	3.9833	17.5	3.61939	0.0136749	211
'rpsA'	249	28.8167	246.667	35.8255	0.013583	2974
'adk'	36.5	2.94958	36.1667	2.40139	0.0132358	436
'speE1'	18.8333	3.76386	18.6667	3.01109	0.012824	225
'PA0317'	19.3333	2.87518	19.1667	2.2286	0.0124909	231
'sucA'	120.833	8.75024	119.833	5.30723	0.0119892	1444
'sucB'	131.167	6.43169	130.167	5.77639	0.0110411	1568
'ffh'	24.1667	6.3692	24	1.78885	0.00998409	289
'rplF'	73.6667	7.06163	73.1667	2.48328	0.00982543	881
'greA'	24.8333	1.16905	24.6667	0.816497	0.00971515	297
'tatA'	28.1667	3.25064	28	2.68328	0.00856201	337
'rpsS'	29.3333	1.21106	29.1667	1.32916	0.00822051	351
'pctC'	35	4.81664	34.8333	4.21505	0.00688639	419
'PA5134'	20.3333	3.9833	20.3333	9.26643	0	244
'PA4400'	1.66667	1.63299	1.66667	1.96638	0	20
'bdhA'	1.66667	1.63299	1.66667	2.33809	0	20
'cobO'	1.66667	0.816497	1.66667	0.516398	0	20
'msbA'	1.66667	1.63299	1.66667	1.8619	0	20
'rnt'	1.66667	1.96638	1.66667	2.25093	0	20
'sdhD'	1.66667	0.816497	1.66667	1.0328	0	20
'argF'	1.83333	0.752773	1.83333	1.32916	0	22
'argA'	2	2.52982	2	1.89737	0	24
'mtnC'	2	1.89737	2	2.19089	0	24
'fleN'	2.16667	1.47196	2.16667	1.16905	0	26
'kynB'	2.16667	2.71416	2.16667	1.94079	0	26
'PA3798'	2.33333	1.96638	2.33333	1.75119	0	28
'PA4115'	2.66667	1.63299	2.66667	1.0328	0	32
'hmp'	2.66667	2.25093	2.66667	2.58199	0	32
'smpB'	2.66667	1.0328	2.66667	1.0328	0	32
'PA3341'	2.83333	4.11906	2.83333	2.99444	0	34
'PA4739'	2.83333	0.752773	2.83333	0.408248	0	34
'ilvH'	3.16667	1.16905	3.16667	1.7224	0	38
'msrA'	3.5	1.3784	3.5	2.42899	0	42
'erpA'	3.66667	0.516398	3.66667	0.516398	0	44
'panC'	4.33333	2.06559	4.33333	2.65832	0	52
'pyrD'	4.33333	1.96638	4.33333	3.4448	0	52
'xcpT'	4.83333	1.83485	4.83333	1.7224	0	58
'PA3302'	5.16667	2.40139	5.16667	1.16905	0	62
'PA3031'	6.5	0.547723	6.5	1.04881	0	78
'algQ'	6.5	1.3784	6.5	1.64317	0	78
'coaD'	7.16667	2.56255	7.16667	1.16905	0	86
'lysA'	7.16667	3.18852	7.16667	4.26224	0	86
'xseB'	7.66667	0.516398	7.66667	2.50333	0	92
'secG'	8	0.632456	8	2.28035	0	96
'PA4923'	8.16667	0.752773	8.16667	0.408248	0	98
'lpxA'	8.33333	2.73252	8.33333	4.08248	0	100
'cobW'	8.5	0.83666	8.5	1.64317	0	102
'PA1533'	9.16667	2.92689	9.16667	2.71416	0	110
'selD'	11.5	1.64317	11.5	1.04881	0	138
'PA4463'	14.3333	8.6641	14.3333	10.9666	0	172
'cspA'	14.5	6.02495	14.5	4.67974	0	174
'glmM'	18.3333	6.3456	18.3333	4.32049	0	220
'hupA'	21.3333	3.38625	21.3333	2.33809	0	256
'rplU'	30.1667	2.13698	30.1667	3.92003	0	362
'ppiB'	30.8333	4.07022	30.8333	0.752773	0	370
'serA'	32.5	6.47302	32.5	6.34823	0	390
'tolB'	36.8333	6.04704	36.8333	5.77639	0	442
'ilvC'	59	10.139	59	4.73286	0	708
'etfA'	87.8333	6.49359	87.8333	6.24233	0	1054
'rplA'	93.6667	10.8012	93.6667	17.2935	0	1124
'aruC'	81.8333	4.26224	82	6.54217	-0.00293529	983
'PA4022'	74	5.2915	74.1667	2.92689	-0.00324566	889
'accC'	56	3.63318	56.1667	4.62241	-0.00428736	673
'wbpE'	34.3333	4.58984	34.5	3.01662	-0.00698643	413
'rplN'	32	3.40588	32.1667	1.16905	-0.00749454	385
'valS'	62.1667	4.26224	62.5	5.31977	-0.00771497	748
'PA5217'	27.8333	7.25029	28	4.19524	-0.00861313	335
'glyQ'	24.6667	1.50555	24.8333	1.47196	-0.00971515	297
'pgk'	71.8333	3.76386	72.3333	7.63326	-0.0100072	865
'ppa'	22.5	2.07364	22.6667	2.65832	-0.0106472	271
'ppiD'	44.6667	6.77249	45	5.86515	-0.0107264	538
'PA4322'	15.8333	4.83391	16	5.89915	-0.0151069	191
'PA3529'	30.6667	1.96638	31	3.40588	-0.0155969	370
'prs'	60.3333	2.87518	61	4.24264	-0.015854	728
'atpG'	26.8333	7.67898	27.1667	5.67157	-0.0178113	324
'rpsH'	52.3333	11.2546	53	8.17313	-0.0182622	632
'PA3988'	12.8333	1.16905	13	0.894427	-0.0186157	155
'PA4453'	12.8333	1.83485	13	1.54919	-0.0186157	155
'aspA'	50.8333	4.70815	51.5	4.23084	-0.0187976	614
'PA2112'	36.5	6.53452	37	8.5557	-0.0196288	441
'oprI'	23.8333	2.78687	24.1667	4.57894	-0.0200378	288
'pyrB'	11.8333	3.97073	12	2.28035	-0.0201779	143
'rpiA'	11.5	2.66458	11.6667	2.33809	-0.0207586	139
'thrS'	33.3333	1.75119	33.8333	2.99444	-0.0214797	403
'metG'	21.6667	1.63299	22	4.89898	-0.0220263	262
'thiG'	21.3333	3.93277	21.6667	2.33809	-0.0223678	258
'pyrG'	62	7.94984	63	7.29383	-0.0230836	750
'bkdA1'	51.1667	13.2124	52	10	-0.0233074	619
'dksA'	37.6667	2.94392	38.3333	2.73252	-0.0253111	456
'cysB'	9.33333	3.07679	9.5	1.3784	-0.0255351	113
'rplV'	36.3333	3.55903	37	4.04969	-0.0262315	440
'hemA'	9	4.69042	9.16667	1.47196	-0.0264722	109
'aruG'	18	2.09762	18.3333	3.01109	-0.0264722	218
'minD'	36	8.3666	36.6667	7.0899	-0.0264722	436
'xenB'	79.6667	7.33939	81.1667	8.10967	-0.0269112	965
'fabB'	57.8333	8.99815	59	11.5412	-0.0288137	701
'PA4595'	49.3333	3.38625	50.3333	4.88535	-0.0289514	598
'PA1615'	8.16667	4.70815	8.33333	3.7238	-0.0291463	99
'nuoF'	39.8333	2.63944	40.6667	8.06639	-0.0298705	483
'hpd'	153.5	6.59545	156.833	18.6163	-0.0309936	1862
'aspP'	7.66667	3.26599	7.83333	4.07022	-0.0310269	93
'hemF'	7.66667	1.0328	7.83333	0.752773	-0.0310269	93
'pheS'	15.1667	1.83485	15.5	1.04881	-0.0313642	184
'fusA'	340.333	35.2288	348	45.5104	-0.0321388	4130
'rpsD'	87.6667	15.7311	89.6667	11.1833	-0.0325434	1064
'sucD'	130.5	13.6785	133.5	22.5987	-0.0327899	1584
'PA1579'	14.1667	1.32916	14.5	2.81069	-0.0335526	172
'trpE'	7	3.40588	7.16667	2.78687	-0.0339473	85
'ahpF'	13.6667	3.38625	14	3.28634	-0.0347654	166
'PA0102'	20.1667	4.30891	20.6667	3.9833	-0.0353331	245
'icd'	153.167	4.35507	157	2.75681	-0.0356622	1861
'PA3001'	64	4.04969	65.6667	6.62319	-0.0370893	778
'pilG'	12.6667	1.63299	13	2.60768	-0.0374747	154
'prlC'	31.1667	4.44597	32	3.57771	-0.038068	379
'PA0856'	18.6667	2.65832	19.1667	9.78604	-0.0381351	227
'pgl'	12.3333	1.50555	12.6667	2.25093	-0.0384741	150
'ansB'	36.6667	4.32049	37.6667	7.44759	-0.0388192	446
'PA4473'	6	1.78885	6.16667	2.78687	-0.0395284	73
'maiA'	23.5	2.34521	24.1667	1.60208	-0.0403577	286
'rplJ'	46.8333	1.83485	48.1667	2.92689	-0.0404994	570
'thiD'	5.83333	5.70672	6	4.47214	-0.040642	71
'bamD'	34.8333	2.63944	35.8333	7.78246	-0.0408337	424
'rplS'	34.5	3.61939	35.5	2.94958	-0.0412227	420
'ibpA'	11.5	1.3784	11.8333	2.2286	-0.0412227	140
'PA5198'	5.5	3.67423	5.66667	4.96655	-0.0430687	67
'rplK'	22	5.4037	22.6667	4.96655	-0.0430687	268
'PA4387'	5.33333	1.36626	5.5	2.81069	-0.0443941	65
'gatB'	31.8333	3.92003	32.8333	3.76386	-0.044623	388
'opgG'	31.5	1.3784	32.5	3.937	-0.0450879	384
'rhdA'	5.16667	2.63944	5.33333	2.94392	-0.0458037	63
'rplD'	41.1667	5.38207	42.5	8.68907	-0.0459862	502
'phoP'	25	22.4589	25.8333	19.9942	-0.0473057	305
'PA2491'	39.6667	3.7238	41	4	-0.0476967	484
'rpoZ'	29.3333	4.32049	30.3333	10.328	-0.048363	358
'PA3262'	44	2.52982	45.5	7.25948	-0.048363	537
'argG'	34.1667	3.54495	35.3333	6.25033	-0.0484404	417
'tufA'	684.167	57.6278	707.667	45.421	-0.0487221	8351
'acnA'	14.1667	5.49242	14.6667	2.58199	-0.0500407	173
'PA4496'	23.5	7.14843	24.3333	5.88784	-0.0502732	287
'rpoN'	4.66667	3.07679	4.83333	3.81663	-0.0506261	57
'PA4576'	23.3333	7.36659	24.1667	5.77639	-0.0506261	285
'accB'	23.3333	2.06559	24.1667	2.63944	-0.0506261	285
'atoB'	82.3333	3.4448	85.3333	3.20416	-0.0516328	1006
'PA0588'	13.6667	5.71548	14.1667	8.75024	-0.0518389	167
'hom'	26.3333	4.08248	27.3333	3.77712	-0.0537713	322
'PA1053'	21.6667	3.07679	22.5	3.33167	-0.0544478	265
'PA0961'	4.33333	1.75119	4.5	1.3784	-0.0544478	53
'infC'	29.3333	7.36659	30.5	7.00714	-0.0562682	359
'rpoA'	73.5	6.2849	76.5	7.17635	-0.0577155	900
'secF'	8.16667	2.31661	8.5	2.58844	-0.0577155	100
'cycB'	20.3333	3.32666	21.1667	2.71416	-0.0579473	249
'upp'	16.1667	2.63944	16.8333	4.62241	-0.0582986	198
'sucC'	104.333	30.1308	108.667	25.6879	-0.0587093	1278
'PA3849'	4	3.40588	4.16667	4.57894	-0.0588937	49
'PA5064'	4	1.67332	4.16667	2.2286	-0.0588937	49
'kynU'	4	2.89828	4.16667	2.63944	-0.0588937	49
'prc'	12	6.03324	12.5	5.75326	-0.0588937	147
'PA2630'	11.8333	7.96032	12.3333	7.78888	-0.0597062	145
'PA3190'	54.8333	5.87934	57.1667	4.83391	-0.060121	672
'PA0744'	11.6667	2.65832	12.1667	3.71035	-0.0605415	143
'prpB'	11.6667	1.63299	12.1667	3.0605	-0.0605415	143
'PA4606'	11.3333	2.65832	11.8333	2.99444	-0.0622843	139
'fadD1'	45.1667	1.83485	47.1667	3.65605	-0.0625092	554
'fabF'	22.3333	2.80476	23.3333	4.84424	-0.0631938	274
'PA4438'	3.66667	1.21106	3.83333	0.752773	-0.0641303	45
'glnK'	14.3333	2.42212	15	1.78885	-0.0655883	176
'aotJ'	53.6667	4.36654	56.1667	4.99667	-0.0656879	659
'asd'	17.8333	2.31661	18.6667	3.07679	-0.0658879	219
'speA'	17.8333	3.97073	18.6667	4.71876	-0.0658879	219
'hitA'	10.6667	2.58199	11.1667	3.37145	-0.0660892	131
'PA4423'	24.6667	3.88158	25.8333	5.87934	-0.066671	303
'PA0039'	3.5	0.547723	3.66667	0.516398	-0.0671142	43
'dut'	3.5	0.547723	3.66667	1.75119	-0.0671142	43
'typA'	21	5.25357	22	6.09918	-0.0671142	258
'aceF'	103.667	9.30949	108.667	7.0899	-0.0679574	1274
'hisG'	17.1667	3.0605	18	5.09902	-0.068387	211
'PA0315'	13.5	5.12835	14.1667	3.92003	-0.0695409	166
'PA4061'	26.8333	1.83485	28.1667	4.07022	-0.0699626	330
'PA0959'	6.66667	2.06559	7	2.75681	-0.0703893	82
'PA5406'	6.66667	2.42212	7	1.54919	-0.0703893	82
'ptsN'	10	2.68328	10.5	2.58844	-0.0703893	123
'uvrA'	10	4.24264	10.5	4.37035	-0.0703893	123
'bkdA2'	43.1667	4.11906	45.3333	6.21825	-0.0706546	531
'gatA'	39.8333	4.35507	41.8333	4.07022	-0.0706767	490
'rpsB'	105.167	20.3216	110.5	23.3131	-0.0713689	1294
'gabT'	82	2.82843	86.1667	5.15429	-0.071506	1009
'PA3187'	19.6667	2.42212	20.6667	2.94392	-0.0715533	242
'rhlB'	9.83333	2.48328	10.3333	1.75119	-0.0715533	121
'PA2116'	6.5	1.51658	6.83333	1.7224	-0.0721498	80
'nfuA'	9.66667	3.7238	10.1667	4.79236	-0.0727563	119
'galU'	19.3333	6.3456	20.3333	5.60952	-0.0727563	238
'clpB'	54.3333	10.7641	57.1667	14.8515	-0.0733366	669
'PA4452'	3.16667	0.408248	3.33333	0.816497	-0.0740006	39
'PA2770'	6.33333	0.516398	6.66667	1.75119	-0.0740006	78
'efp'	28.5	3.61939	30	3.57771	-0.0740006	351
'rplE'	72.6667	9.89276	76.5	10.8397	-0.074166	895
'hisA'	15.6667	1.63299	16.5	1.64317	-0.0747678	193
'PA0423'	76.5	3.44964	80.6667	5.85377	-0.0765129	943
'PA1746'	3	0	3.16667	0.408248	-0.0780025	37
'cysM'	3	1.09545	3.16667	0.983192	-0.0780025	37
'pilY1'	3	3.4641	3.16667	4.30891	-0.0780025	37
'rpsR'	15	2.68328	15.8333	1.16905	-0.0780025	185
'iscS'	32.1667	5.03653	34	2.09762	-0.0799683	397
'PA3214'	5.83333	2.40139	6.16667	1.94079	-0.0801703	72
'hemE'	8.66667	6.43946	9.16667	5.98052	-0.08092	107
'PA1737'	2.83333	1.16905	3	1.26491	-0.0824622	35
'folP'	2.83333	1.16905	3	1.26491	-0.0824622	35
'pyrR'	2.83333	1.83485	3	0.894427	-0.0824622	35
'atpH'	41.8333	2.13698	44.3333	6.68331	-0.0837389	517
'PA2817'	8.33333	4.17931	8.83333	2.2286	-0.0840643	103
'trxA'	38.5	2.73861	40.8333	2.48328	-0.0848889	476
'glnS'	30	1.41421	31.8333	2.04124	-0.0855757	371
'PA5285'	27.1667	3.25064	28.8333	2.71416	-0.0859001	336
'lepA'	13.3333	3.9833	14.1667	4.16733	-0.0874628	165
'PA3838'	5.16667	1.16905	5.5	1.3784	-0.0901978	64
'tolR'	5.16667	3.0605	5.5	1.51658	-0.0901978	64
'rplX'	48.8333	5.74166	52	1.26491	-0.0906454	605
'PA2800'	2.5	1.76068	2.66667	1.50555	-0.0931094	31
'PA4459'	2.5	0.83666	2.66667	0.516398	-0.0931094	31
'PA4604'	2.5	3.01662	2.66667	1.50555	-0.0931094	31
'PA4336'	5	0.632456	5.33333	0.816497	-0.0931094	62
'fahA'	75	11.5585	80	10.2567	-0.0931094	930
'PA5528'	34.8333	5.03653	37.1667	5.45588	-0.0935408	432
'braC'	101.5	4.59347	108.333	8.23812	-0.0939975	1259
'rplY'	111.333	3.77712	118.833	7.52108	-0.094054	1381
'fadB'	51.5	3.01662	55	2.75681	-0.0948592	639
'fecA'	7.33333	2.42212	7.83333	1.16905	-0.0951572	91
'hmgA'	77.6667	8.47742	83	6.54217	-0.0958158	964
'PA3822'	4.83333	0.983192	5.16667	0.752773	-0.0962153	60
'PA4907'	12	2.89828	12.8333	1.16905	-0.0968615	149
'glpK1'	12	2	12.8333	3.0605	-0.0968615	149
'PA1041'	2.33333	1.63299	2.5	2.16795	-0.0995357	29
'PA4135'	2.33333	1.21106	2.5	0.83666	-0.0995357	29
'ispH'	2.33333	1.36626	2.5	0.547723	-0.0995357	29
'spuE'	18.6667	3.20416	20	2.36643	-0.0995357	232
'gltA'	129.167	9.34701	138.5	12.3085	-0.100652	1606
'PA1830'	20.5	1.64317	22	4.93964	-0.10188	255
'PA4454'	6.66667	5.50151	7.16667	4.26224	-0.104337	83
'PA3801'	15.3333	1.8619	16.5	1.76068	-0.105795	191
'pykA'	67.5	12.8647	72.6667	9.62635	-0.106406	841
'PA0128'	2.16667	0.752773	2.33333	0.516398	-0.106915	27
'PA3787'	2.16667	0.408248	2.33333	0.816497	-0.106915	27
'oprH'	2.16667	2.56255	2.33333	1.36626	-0.106915	27
'PA3208'	4.33333	1.21106	4.66667	3.14113	-0.106915	54
'PA3567'	4.33333	3.07679	4.66667	3.6697	-0.106915	54
'psd'	4.33333	0.816497	4.66667	1.36626	-0.106915	54
'spuF'	8.66667	3.07679	9.33333	3.07679	-0.106915	108
'PA1011'	32.3333	3.61478	34.8333	7.19491	-0.107446	403
'glcB'	47.3333	9.28799	51	2.82843	-0.107641	590
'lon'	27.8333	7.3598	30	3.34664	-0.108149	347
'PA2737'	4.16667	1.32916	4.5	1.22474	-0.111031	52
'acsA1'	87.5	7.34166	94.5	1.97484	-0.111031	1092
'atpF'	14.5	2.73861	15.6667	3.6697	-0.111645	181
'crc'	14.5	2.58844	15.6667	2.65832	-0.111645	181
'dhcA'	26.8333	4.30891	29	4.93964	-0.112027	335
'ahpC'	72.1667	5.07609	78	3.34664	-0.112142	901
'rsfS'	6.16667	1.47196	6.66667	1.0328	-0.112475	77
'PA5435'	55.3333	6.18601	59.8333	3.71035	-0.112801	691
'recA'	51.1667	3.65605	55.3333	5.60952	-0.112945	639
'PA4502'	8.16667	4.70815	8.83333	2.13698	-0.113211	102
'PA0758'	10.1667	2.31661	11	3.03315	-0.113657	127
'PA5006'	2	2.09762	2.16667	2.13698	-0.115477	25
'cysA'	2	1.89737	2.16667	1.83485	-0.115477	25
'PA3998'	5.83333	2.56255	6.33333	1.75119	-0.118644	73
'gatC'	21.3333	2.42212	23.1667	3.81663	-0.118941	267
'PA4673'	25.1667	3.0605	27.3333	3.61478	-0.119147	315
'fimV'	30.8333	4.26224	33.5	2.66458	-0.11967	386
'slyD'	7.66667	0.816497	8.33333	2.33809	-0.120294	96
'proS'	72.3333	3.07679	78.6667	7.71146	-0.121092	906
'rplI'	68	4.47214	74	4.85798	-0.121991	852
'PA5174'	33.8333	7.30525	36.8333	13.3179	-0.122567	424
'nuoG'	37.5	5.54076	40.8333	5.94699	-0.122857	470
'ung'	9.33333	0.516398	10.1667	2.56255	-0.123382	117
'purC'	26	4.42719	28.3333	4.54606	-0.123989	326
'PA4738'	3.66667	0.516398	4	0	-0.125531	46
'dxs'	3.66667	1.21106	4	1.26491	-0.125531	46
'zipA'	11	2.09762	12	1.09545	-0.125531	138
'obg'	25.6667	4.67618	28	5.83095	-0.125531	322
'opr86'	25.5	7.47663	27.8333	12.3356	-0.126316	320
'serS'	16.3333	2.80476	17.8333	3.18852	-0.126757	205
'fabD'	27.1667	3.97073	29.6667	1.8619	-0.127005	341
'cysK'	12.6667	3.38625	13.8333	4.79236	-0.127112	159
'PA3675'	9	2.60768	9.83333	3.92003	-0.127756	113
'nqrF'	5.33333	2.58199	5.83333	3.0605	-0.129283	67
'PA2735'	10.6667	2.87518	11.6667	1.0328	-0.129283	134
'liuB'	23	2.52982	25.1667	2.2286	-0.12988	289
'trmB'	17.6667	3.07679	19.3333	4.4121	-0.130061	222
'gabD'	54.6667	2.58199	59.8333	5.81091	-0.130288	687
'rpmB'	12.3333	4.58984	13.5	6.83374	-0.130397	155
'PA4636'	3.5	1.64317	3.83333	0.752773	-0.131245	44
'astD'	28	3.16228	30.6667	1.0328	-0.131245	352
'ndk'	59.5	9.35414	65.1667	12.3356	-0.131245	748
'liuR'	5.16667	1.83485	5.66667	1.0328	-0.133267	65
'nusA'	66.5	2.42899	73	4.04969	-0.134542	837
'grpE'	45.8333	2.92689	50.3333	3.6697	-0.135117	577
'PA3347'	1.66667	1.36626	1.83333	1.16905	-0.137504	21
'PA5075'	1.66667	1.36626	1.83333	1.16905	-0.137504	21
'PA1341'	5	1.54919	5.5	0.547723	-0.137504	63
'pilF'	6.66667	0.816497	7.33333	0.516398	-0.137504	84
'spuD'	39.8333	4.26224	43.8333	3.18852	-0.138052	502
'PA4333'	56	4.85798	61.6667	4.63321	-0.139064	706
'PA4500'	9.83333	3.81663	10.8333	6.79461	-0.139725	124
'folE2'	8.16667	5.81091	9	3.2249	-0.140178	103
'accA'	56.8333	7.02614	62.6667	6.8313	-0.140961	717
'PA1127'	3.16667	2.78687	3.5	1.64317	-0.14439	40
'PA2381'	6.33333	1.0328	7	1.89737	-0.14439	80
'PA2854'	6.33333	1.63299	7	2.75681	-0.14439	80
'PA3466'	6.33333	3.32666	7	4.77493	-0.14439	80
'PA3611'	7.83333	1.16905	8.66667	0.516398	-0.145851	99
'prpC'	49.6667	9.0037	55	5.6921	-0.147154	628
'chpA'	18.5	2.88097	20.5	4.03733	-0.148099	234
'tal'	21.3333	5.24087	23.6667	4.58984	-0.149747	270
'PA2197'	4.5	1.22474	5	2.19089	-0.152003	57
'trpB'	4.5	2.07364	5	4.28952	-0.152003	57
'kdsD'	7.5	1.87083	8.33333	1.21106	-0.152003	95
'tsf'	102	12.0333	113.5	20.0175	-0.154123	1293
'hemL'	41.3333	2.65832	46	3.40588	-0.154328	524
'vfr'	7.33333	4.32049	8.16667	4.83391	-0.155278	93
'fimX'	4.33333	1.63299	4.83333	3.0605	-0.157541	55
'liuA'	48.8333	4.26224	54.5	3.33167	-0.15839	620
'minE'	7.16667	1.47196	8	0.894427	-0.158698	91
'pilQ'	22.6667	7.25718	25.3333	5.57375	-0.160465	288
'PA2553'	53.5	8.04363	59.8333	5.4191	-0.161411	680
'PA5505'	22.1667	4.62241	24.8333	4.83391	-0.163886	282
'PA4395'	19.1667	5.63619	21.5	2.34521	-0.165737	244
'algC'	31.3333	3.55903	35.1667	4.44597	-0.16651	399
'lysS'	50.3333	4.2269	56.5	8.09321	-0.166737	641
'gcvT2'	21.5	3.08221	24.1667	5.30723	-0.168682	274
PA0011'	2.66667	1.96638	3	2.09762	-0.169925	34
'PA2990'	2.66667	2.80476	3	3.4641	-0.169925	34
'glk'	4	2.19089	4.5	3.01662	-0.169925	51
'gloA'	4	2.68328	4.5	2.50998	-0.169925	51
'dacA'	36	2.82843	40.5	1.64317	-0.169925	459
'gcvP1'	48.3333	7.20185	54.5	6.47302	-0.173238	617
'prfB'	14.3333	2.33809	16.1667	2.92689	-0.173648	183
'guaA'	62.5	5.68331	70.5	6.1563	-0.173767	798
'mmsA'	33.1667	13.732	37.5	13.1111	-0.177157	424
'PA3817'	2.5	1.22474	2.83333	1.47196	-0.180572	32
'PA4505'	2.5	0.547723	2.83333	0.408248	-0.180572	32
'PA0130'	7.5	2.25832	8.5	2.94958	-0.180572	96
'PA0020'	12.5	1.64317	14.1667	1.94079	-0.180572	160
'PA0947'	3.66667	0.516398	4.16667	1.47196	-0.184425	47
'PA1064'	3.66667	2.42212	4.16667	1.47196	-0.184425	47
'PA1244'	3.66667	2.25093	4.16667	0.983192	-0.184425	47
'PA3965'	3.66667	0.516398	4.16667	1.94079	-0.184425	47
'miaB'	3.66667	3.20416	4.16667	2.2286	-0.184425	47
'rpsP'	29.3333	1.63299	33.3333	4.4572	-0.184425	376
'purM'	20.5	3.88587	23.3333	2.06559	-0.186769	263
'pyrE'	15.6667	3.14113	17.8333	4.16733	-0.186878	201
'def'	12	2.82843	13.6667	3.50238	-0.187627	154
'anr'	13.1667	2.63944	15	3.03315	-0.188072	169
'purD'	23.8333	2.63944	27.1667	4.91596	-0.188857	306
'bkdB'	39.6667	8.73308	45.3333	8.71015	-0.192645	510
'oprF'	74.1667	13.7611	84.8333	7.70498	-0.19386	954
'spuC'	46.3333	3.20416	53	4.09878	-0.193942	596
'PA4676'	17.1667	3.86868	19.6667	4.58984	-0.196143	221
'PA2483'	8	1.67332	9.16667	1.32916	-0.196397	103
'bioB'	18.1667	5.4191	20.8333	6.5549	-0.1976	234
'pepP'	14.6667	2.06559	16.8333	3.71035	-0.19878	189
'PA0602'	3.33333	1.21106	3.83333	1.16905	-0.201634	43
'PA2983'	3.33333	0.816497	3.83333	0.752773	-0.201634	43
'bioA'	3.33333	1.96638	3.83333	3.18852	-0.201634	43
'proC'	8.83333	1.16905	10.1667	1.16905	-0.202817	114
'PA0794'	17.6667	3.55903	20.3333	3.55903	-0.202817	228
'gloA1'	2.16667	0.408248	2.5	0.547723	-0.206451	28
'PA4426'	4.33333	2.50333	5	2.68328	-0.206451	56
'PA5152'	9.66667	4.96655	11.1667	5.19294	-0.208108	125
'PA3356'	17.1667	2.63944	19.8333	3.0605	-0.208317	222
'glyA1'	5.33333	6.37704	6.16667	4.57894	-0.209453	69
'cysE'	6.33333	1.96638	7.33333	1.50555	-0.211504	82
'purT'	6.33333	4.88535	7.33333	4.08248	-0.211504	82
'fadA'	25.1667	2.48328	29.1667	2.48328	-0.212806	326
'pilJ'	17.6667	3.6697	20.5	3.98748	-0.214594	229
'PA2826'	5.16667	0.983192	6	1.09545	-0.215729	67
'PA4880'	5.16667	1.94079	6	3.09839	-0.215729	67
'dsbA'	13.1667	1.16905	15.3333	1.96638	-0.219781	171
'PA1526'	2	2.36643	2.33333	2.25093	-0.222392	26
'gor'	4	3.03315	4.66667	2.25093	-0.222392	52
'pheA'	4	2.96648	4.66667	0.816497	-0.222392	52
'pilP'	4	1.26491	4.66667	1.0328	-0.222392	52
'clpA'	6	3.52136	7	1.89737	-0.222392	78
'PA4498'	9	2.75681	10.5	4.67974	-0.222392	117
'fleQ'	13	4.51664	15.1667	3.0605	-0.222392	169
'ribB'	17	2.52982	19.8333	4.75044	-0.222392	221
'mmsB'	11.8333	6.79461	13.8333	11.5138	-0.225292	154
'dhcB'	34.1667	1.16905	40	4.19524	-0.22741	445
'pepN'	32.6667	3.01109	38.3333	4.84424	-0.23078	426
'atpB'	13.3333	1.0328	15.6667	2.25093	-0.232661	174
'PA4506'	7.5	3.01662	8.83333	2.48328	-0.236067	98
'rplC'	56	14.1986	66	16.5288	-0.237039	732
'phaA'	15.8333	2.92689	18.6667	5.92171	-0.237499	207
'PA3836'	42.8333	4.16733	50.5	4.80625	-0.237549	560
'ggt'	25.8333	3.86868	30.5	5.31977	-0.239575	338
'PA2734'	1.83333	1.16905	2.16667	1.94079	-0.241008	24
'PA4523'	1.83333	0.408248	2.16667	0.752773	-0.241008	24
'PA5472'	1.83333	0.983192	2.16667	0.408248	-0.241008	24
'phhA'	17.3333	4.0332	20.5	2.88097	-0.242075	227
'tyrS2'	38.5	5.95819	45.6667	6.53197	-0.246283	505
'oxyR'	10.6667	1.75119	12.6667	1.21106	-0.247928	140
'PA0446'	14.1667	2.48328	16.8333	0.752773	-0.248821	186
'murC'	6.16667	1.83485	7.33333	3.61478	-0.249978	81
'folD'	7	3.40588	8.33333	2.58199	-0.251539	92
'pilO'	7.83333	1.83485	9.33333	2.33809	-0.252766	103
'PA0848'	4.33333	3.9833	5.16667	3.18852	-0.253757	57
'purE'	8.66667	1.21106	10.3333	1.0328	-0.253757	114
'pilC'	9.5	3.01662	11.3333	3.6697	-0.254573	125
'PA4372'	16.1667	3.97073	19.3333	2.33809	-0.258068	213
'PA2953'	53.1667	3.3116	63.6667	2.58199	-0.260016	701
'PA0660'	1.66667	0.816497	2	0.632456	-0.263034	22
'surE'	1.66667	1.63299	2	2.52982	-0.263034	22
'fliM'	2.5	1.04881	3	0.632456	-0.263034	33
'astB'	22.5	3.20936	27	5.62139	-0.263034	297
'suhB'	13.1667	1.47196	15.8333	6.67583	-0.266075	174
'hisZ'	10.6667	4.84424	12.8333	3.3116	-0.266787	141
'mutS'	10.5	4.67974	12.6667	3.26599	-0.270648	139
'nagZ'	4.83333	1.94079	5.83333	2.99444	-0.271302	64
'PA5153'	32.1667	10.6286	38.8333	12.937	-0.271729	426
'murF'	8	3.2249	9.66667	3.77712	-0.273018	106
'PA3295'	10.3333	1.0328	12.5	2.16795	-0.274622	137
'PA0473'	3.16667	1.94079	3.83333	2.13698	-0.275634	42
'bfrB'	8.66667	2.50333	10.5	0.547723	-0.27684	115
'cysS'	7.83333	1.94079	9.5	2.94958	-0.278301	104
'PA4290'	2.33333	1.50555	2.83333	0.752773	-0.280108	31
'ratA'	2.33333	0.516398	2.83333	1.32916	-0.280108	31
'mtnA'	4.66667	2.73252	5.66667	3.4448	-0.280108	62
'aotP'	15.5	2.94958	18.8333	3.0605	-0.28102	206
'purU1'	6.83333	1.16905	8.33333	2.65832	-0.286304	91
'trxB1'	12.8333	3.12517	15.6667	3.4448	-0.287802	171
'PA2685'	1.5	1.64317	1.83333	1.47196	-0.289507	20
'PA0068'	1.5	0.83666	1.83333	0.408248	-0.289507	20
'PA0372'	6.66667	3.7238	8.16667	3.71035	-0.292782	89
'PA3435'	13.3333	1.8619	16.3333	2.65832	-0.292782	178
'leuB'	4.33333	1.50555	5.33333	1.50555	-0.29956	58
'ldcA'	21.1667	4.83391	26.1667	4.26224	-0.305936	284
'leuA'	20.3333	2.73252	25.1667	3.86868	-0.307667	273
'PA2805'	11	2.75681	13.6667	1.96638	-0.313158	148
'PA3481'	12.3333	2.80476	15.3333	3.6697	-0.314109	166
'fdxA'	6.83333	3.65605	8.5	0.547723	-0.314873	92
'rsmH'	6.83333	1.32916	8.5	1.04881	-0.314873	92
'cysD'	11.5	1.97484	14.3333	2.65832	-0.31774	155
'PA0507'	2	1.09545	2.5	0.83666	-0.321928	27
'PA3859'	2	1.67332	2.5	1.76068	-0.321928	27
'nadA'	6	1.54919	7.5	3.08221	-0.321928	81
'amrZ'	11.3333	1.8619	14.1667	2.04124	-0.321928	153
'PA4198'	6.66667	0.816497	8.33333	0.516398	-0.321928	90
'PA2840'	15.1667	10.5341	19	10.6395	-0.325095	205
'polA'	7.16667	2.48328	9	4.3359	-0.328623	97
'ispG'	13.6667	1.8619	17.1667	3.86868	-0.328949	185
'PA1742'	9	3.34664	11.3333	2.80476	-0.332575	122
'PA5138'	3.16667	1.32916	4	1.26491	-0.337035	43
'cmk'	3.16667	0.983192	4	1.89737	-0.337035	43
'PA0603'	5.66667	1.75119	7.16667	3.18852	-0.338802	77
'PA1295'	2.5	1.64317	3.16667	1.16905	-0.341037	34
'PA1571'	2.5	0.83666	3.16667	1.32916	-0.341037	34
'sspB'	2.5	0.83666	3.16667	0.408248	-0.341037	34
'truB'	5	3.34664	6.33333	6.21825	-0.341037	68
'PA2554'	11.6667	2.06559	14.8333	3.54495	-0.34645	159
'PA0419'	1.83333	1.16905	2.33333	1.21106	-0.347923	25
'gltD'	1.83333	1.47196	2.33333	1.63299	-0.347923	25
'cld'	7.33333	1.0328	9.33333	4.13118	-0.347923	100
'PA3602'	9	1.67332	11.5	1.51658	-0.353637	123
'ribA'	4.16667	1.7224	5.33333	2.33809	-0.356144	57
'PA2410'	5.33333	1.8619	6.83333	1.83485	-0.357552	73
'PA3539'	2.33333	2.06559	3	2	-0.36257	32
'PA5209'	2.33333	1.36626	3	2.36643	-0.36257	32
'PA4434'	3.5	2.58844	4.5	1.3784	-0.36257	48
'PA3819'	4.66667	0.816497	6	1.26491	-0.36257	64
'eco'	6.83333	1.47196	8.83333	2.48328	-0.370368	94
'braG'	9.66667	1.36626	12.5	1.97484	-0.370838	133
'pilH'	13.5	2.07364	17.5	1.3784	-0.374396	186
'hisD'	11.1667	4.07022	14.5	3.01662	-0.376854	154
'PA0354'	1.66667	0.816497	2.16667	0.408248	-0.378512	23
'rimP'	1.66667	2.25093	2.16667	2.78687	-0.378512	23
'eda'	8.33333	2.58199	10.8333	2.99444	-0.378512	115
'nuoH'	2.16667	1.32916	2.83333	1.60208	-0.387023	30
'pilU'	3.16667	1.83485	4.16667	1.83485	-0.395929	44
'rluB'	6.33333	4.2269	8.33333	2.50333	-0.395929	88
'PA2114'	1.5	2.34521	2	2.28035	-0.415037	21
'PA3726'	1.5	1.3784	2	1.78885	-0.415037	21
'fruK'	1.5	1.3784	2	1.09545	-0.415037	21
'nrdR'	1.5	0.547723	2	0.894427	-0.415037	21
'PA5340'	3.5	1.22474	4.66667	1.36626	-0.415037	49
'roxR'	4	0.894427	5.33333	1.0328	-0.415037	56
'plsX'	4.5	2.16795	6	1.26491	-0.415037	63
'mexA'	10.5	0.83666	14	1.41421	-0.415037	147
'PA4558'	12	0.894427	16.1667	3.86868	-0.429988	169
'aroC'	3.33333	1.50555	4.5	1.3784	-0.432959	47
'wbpD'	2.83333	2.04124	3.83333	2.48328	-0.436099	40
'nuoE'	7.5	1.87083	10.1667	2.92689	-0.438884	106
'PA0171'	2.33333	2.25093	3.16667	1.32916	-0.440573	33
'PA1206'	2.33333	1.63299	3.16667	1.94079	-0.440573	33
'sstT'	2.33333	1.0328	3.16667	1.47196	-0.440573	33
'PA2732'	4.66667	1.0328	6.33333	1.0328	-0.440573	66
'PA0943'	9.66667	2.42212	13.1667	0.983192	-0.4458	137
'PA1140'	1.83333	1.47196	2.5	0.83666	-0.447459	26
'PA5523'	3.66667	2.58199	5	3.28634	-0.447459	52
'pepA'	9.5	10.7098	13	11.6962	-0.452512	135
'PA5545'	5.83333	2.31661	8	1.89737	-0.455679	83
'PA1689'	2.66667	2.33809	3.66667	4.08248	-0.459432	38
'ftsE'	4	1.78885	5.5	2.07364	-0.459432	57
'ilvI'	14.1667	3.18852	19.5	5.35724	-0.460974	202
'pilN'	6.16667	1.7224	8.5	3.98748	-0.462972	88
'PA0746'	8.33333	3.61478	11.5	2.42899	-0.464668	119
'metH'	3	1.89737	4.16667	2.92689	-0.473931	43
'fruR'	3.83333	3.54495	5.33333	3.82971	-0.476438	55
'astE'	7.16667	1.83485	10	1.54919	-0.480626	103
'PA0318'	1.66667	1.50555	2.33333	2.65832	-0.485427	24
'PA4686'	1.66667	1.63299	2.33333	1.96638	-0.485427	24
'era'	1.66667	0.816497	2.33333	1.36626	-0.485427	24
'pilT'	6.16667	2.85774	8.66667	2.06559	-0.490986	89
'aguA'	3.66667	0.516398	5.16667	1.7224	-0.494765	53
'bioC'	3.66667	1.63299	5.16667	2.71416	-0.494765	53
'PA0421'	7.33333	3.93277	10.3333	3.88158	-0.494765	106
'PA0314'	4.83333	1.47196	6.83333	0.983192	-0.499571	70
'PA5507'	10	2.44949	14.1667	2.99444	-0.5025	145
'PA4465'	7.16667	2.13698	10.1667	3.3116	-0.504473	104
'PA3413'	4.33333	1.96638	6.16667	1.16905	-0.509014	63
'dapE'	2.33333	2.65832	3.33333	3.77712	-0.514573	34
'phuT'	2.33333	1.0328	3.33333	2.06559	-0.514573	34
'tesA'	2.33333	1.21106	3.33333	1.21106	-0.514573	34
'PA0487'	1.5	1.22474	2.16667	1.7224	-0.530515	22
'pilM'	15.3333	5.00666	22.1667	2.78687	-0.53172	225
'rpmF'	20.5	6.62571	29.8333	8.2805	-0.541301	302
'fpvA'	6.33333	1.8619	9.33333	2.94392	-0.559427	94
'PA5055'	3.5	2.58844	5.16667	1.32916	-0.561879	52
'PA0974'	4.5	1.3784	6.66667	3.07679	-0.567041	67
'PA3189'	1.33333	1.21106	2	1.41421	-0.584963	20
'soxA'	1.33333	1.21106	2	1.89737	-0.584963	20
'PA0380'	1.66667	2.25093	2.5	2.07364	-0.584963	25
'PA3352'	1.66667	1.50555	2.5	1.22474	-0.584963	25
'mgtE'	1.66667	1.63299	2.5	2.73861	-0.584963	25
'PA4872'	4	2.09762	6	3.34664	-0.584963	60
'PA5378'	4.33333	1.0328	6.5	2.34521	-0.584963	65
'glyA2'	4.33333	4.4121	6.5	5.68331	-0.584963	65
'PA5225'	5.66667	3.4448	8.5	3.08221	-0.584963	85
'pyrH'	14.1667	3.0605	21.5	4.80625	-0.601836	214
'PA5074'	5.33333	2.06559	8.16667	3.18852	-0.61471	81
'rocA1'	2.16667	0.983192	3.33333	1.50555	-0.621488	33
'PA4667'	3	2.09762	4.66667	1.8619	-0.63743	46
'PA5139'	2.66667	1.63299	4.16667	2.63944	-0.643856	41
'PA2798'	2.33333	2.06559	3.66667	2.80476	-0.652077	36
'leuD'	3.5	1.64317	5.5	2.07364	-0.652077	54
'PA1372'	6.33333	3.50238	10	1.09545	-0.658963	98
'gmhA'	7.16667	6.91134	11.3333	5.08593	-0.661198	111
'PA1061'	2	2.09762	3.16667	1.32916	-0.662965	31
'ligA'	2	1.78885	3.16667	3.54495	-0.662965	31
'mtnD'	4	1.89737	6.33333	2.25093	-0.662965	62
'hflD'	2.83333	1.60208	4.5	2.88097	-0.667425	44
'PA3804'	4.5	2.25832	7.16667	1.16905	-0.671377	70
'fdhA'	7.5	1.64317	12	2.75681	-0.678072	117
'mgtA'	33.8333	25.5376	54.3333	48.6689	-0.683392	529
'spuB'	5.5	4.50555	8.83333	4.62241	-0.683526	86
'PA3981'	1.33333	1.75119	2.16667	2.04124	-0.70044	21
'aroB'	7.5	4.27785	12.3333	6.77249	-0.7176	119
'PA2776'	3.33333	2.33809	5.5	1.87083	-0.722466	53
'wbpH'	3.5	0.83666	5.83333	2.56255	-0.736966	56
'PA0946'	2.16667	1.16905	3.66667	2.58199	-0.758992	35
'rmlB'	10.6667	2.94392	18.5	4.46094	-0.794416	175
'PA3566'	2.66667	1.36626	4.66667	1.50555	-0.807355	44
'PA5376'	2.16667	1.32916	3.83333	2.63944	-0.823122	36
'PA1749'	1.5	1.04881	2.66667	1.50555	-0.830075	25
'ribH'	3.83333	1.32916	6.83333	1.16905	-0.83399	64
'hisB'	2.33333	1.8619	4.16667	0.408248	-0.836501	39
'mpl'	1.66667	1.50555	3	2.52982	-0.847997	28
'PA1677'	1.83333	1.32916	3.33333	0.816497	-0.862496	31
'thrB'	1.83333	2.13698	3.33333	1.8619	-0.862496	31
'pstS'	10.5	6.59545	19.1667	16.6303	-0.86821	178
'proB'	3.83333	1.16905	7	2.28035	-0.868755	65
'rpsT'	3.83333	3.37145	7	3.16228	-0.868755	65
'PA4503'	3	3.03315	5.5	2.50998	-0.874469	51
'PA5309'	7	3.16228	12.8333	2.85774	-0.874469	119
'PA5279'	2.5	2.73861	4.66667	1.21106	-0.900464	43
'PA2378'	1.33333	1.96638	2.5	1.3784	-0.906891	23
'dbpA'	1.5	2.07364	2.83333	1.94079	-0.917538	26
'kdsB'	1.5	1.87083	2.83333	1.7224	-0.917538	26
'PA5346'	1.66667	1.63299	3.16667	1.94079	-0.925999	29
'mnmA'	3.5	3.20936	6.66667	2.42212	-0.929611	61
'PA1821'	1.5	1.3784	3	1.67332	-1	27
'rbfA'	2	0.632456	4	1.41421	-1	36
'PA2044'	2.83333	2.13698	5.66667	2.33809	-1	51
'PA3131'	1.33333	1.21106	2.83333	1.47196	-1.08746	25
'PA4308'	1.33333	1.0328	2.83333	2.2286	-1.08746	25
'lpdV'	13.1667	10.8888	28	14.1563	-1.08854	247
'mfd'	1.16667	1.47196	2.5	2.94958	-1.09954	22
'PA2002'	1.33333	1.63299	3	2	-1.16993	26
'PA1748'	1.83333	2.78687	4.16667	2.99444	-1.18442	36
'PA4991'	1	0.894427	2.33333	0.816497	-1.22239	20
'ccoQ2'	1	1.26491	2.33333	0.516398	-1.22239	20
'thyA'	2.5	1.51658	5.83333	3.86868	-1.22239	50
'PA5546'	3.33333	3.32666	7.83333	4.95648	-1.23266	67
'pstB'	1.66667	1.8619	4	2.60768	-1.26303	34
'flgI'	1.33333	2.16025	3.33333	2.94392	-1.32193	28
'ubiD'	1.33333	1.50555	3.33333	2.33809	-1.32193	28
'PA2557'	1.83333	1.7224	4.83333	2.71416	-1.39855	40
'PA1096'	1.5	1.97484	4	2	-1.41504	33
'speD'	2.33333	2.42212	6.66667	2.42212	-1.51457	54
'PA4958'	0.666667	0.516398	3	2.68328	-2.16993	22
'fliD'	0.666667	0.816497	3.5	0.547723	-2.39232	25
'rmlD'	0.5	0.83666	2.83333	2.78687	-2.5025	20

## Sheet: GacRsm targets
'PA0039'
'PA0040'
'PA0042'
'PA0064'
'PA0065'
'PA0066'
'PA0070'
'PA0071'
'PA0072'
'PA0073'
'PA0074'
'PA0075'
'PA0076'
'PA0077'
'PA0078'
'PA0079'
'PA0080'
'PA0081'
'PA0082'
'PA0083'
'PA0084'
'PA0085'
'PA0086'
'PA0087'
'PA0088'
'PA0089'
'PA0090'
'PA0091'
'PA0092'
'PA0093'
'PA0094'
'PA0095'
'PA0096'
'PA0097'
'PA0098'
'PA0099'
'PA0100'
'PA0101'
'PA0169'
'PA0170'
'PA0171'
'PA0172'
'PA0200'
'PA0201'
'PA0277'
'PA0284'
'PA0319'
'PA0320'
'PA0332'
'PA0333'
'PA0360'
'PA0526'
'PA0527'
'PA0537'
'PA0563'
'PA0658'
'PA0659'
'PA0730'
'PA0733'
'PA0734'
'PA0735'
'PA0736'
'PA0749'
'PA0806'
'PA0867'
'PA0989'
'PA1068'
'PA1069'
'PA1126'
'PA1132'
'PA1171'
'PA1202'
'PA1377'
'PA1378'
'PA1394'
'PA1395'
'PA1396'
'PA1450'
'PA1451'
'PA1494'
'PA1543'
'PA1544'
'PA1556'
'PA1557'
'PA1645'
'PA1656'
'PA1657'
'PA1658'
'PA1659'
'PA1673'
'PA1727'
'PA1746'
'PA1789'
'PA1791'
'PA1806'
'PA1808'
'PA1809'
'PA1810'
'PA1811'
'PA1844'
'PA1845'
'PA1941'
'PA2204'
'PA2231'
'PA2232'
'PA2233'
'PA2234'
'PA2235'
'PA2236'
'PA2237'
'PA2238'
'PA2239'
'PA2240'
'PA2241'
'PA2242'
'PA2358'
'PA2380'
'PA2440'
'PA2441'
'PA2449'
'PA2450'
'PA2464'
'PA2465'
'PA2503'
'PA2536'
'PA2537'
'PA2538'
'PA2539'
'PA2540'
'PA2541'
'PA2560'
'PA2581'
'PA2683'
'PA2684'
'PA2685'
'PA2702'
'PA2703'
'PA2723'
'PA2724'
'PA2725'
'PA2726'
'PA2727'
'PA2729'
'PA2772'
'PA2774'
'PA2775'
'PA2792'
'PA2793'
'PA2867'
'PA2916'
'PA2917'
'PA3020'
'PA3021'
'PA3058'
'PA3059'
'PA3060'
'PA3061'
'PA3062'
'PA3063'
'PA3064'
'PA3141'
'PA3186'
'PA3187'
'PA3188'
'PA3189'
'PA3292'
'PA3293'
'PA3294'
'PA3309'
'PA3317'
'PA3337'
'PA3340'
'PA3446'
'PA3482'
'PA3483'
'PA3484'
'PA3485'
'PA3536'
'PA3572'
'PA3619'
'PA3661'
'PA3662'
'PA3716'
'PA3722'
'PA3727'
'PA3728'
'PA3729'
'PA3730'
'PA3731'
'PA3732'
'PA3793'
'PA3794'
'PA3850'
'PA3851'
'PA3852'
'PA3922'
'PA3923'
'PA3931'
'PA4032'
'PA4033'
'PA4058'
'PA4059'
'PA4060'
'PA4110'
'PA4111'
'PA4119'
'PA4120'
'PA4201'
'PA4317'
'PA4318'
'PA4319'
'PA4320'
'PA4321'
'PA4322'
'PA4323'
'PA4327'
'PA4328'
'PA4374'
'PA4375'
'PA4487'
'PA4488'
'PA4489'
'PA4490'
'PA4491'
'PA4492'
'PA4495'
'PA4518'
'PA4571'
'PA4577'
'PA4624'
'PA4625'
'PA4632'
'PA4799'
'PA4800'
'PA4801'
'PA5033'
'PA5112'
'PA5113'
'PA5114'
'PA5120'
'PA5133'
'PA5134'
'PA5135'
'PA5136'
'PA5170'
'PA5171'
'PA5173'
'PA5289'
'PA5290'
'PA5369'
'PA5412'
'PA5427'
'PA5441'
'PA5442'
'PA5461'
'PA5475'
'adhA'
'ampR'
'anr'
'aph'
'apt'
'arcA'
'arcB'
'arcC'
'arcD'
'cat'
'ccoO2'
'cdrA'
'cdrB'
'clpV'
'clpV1'
'ddlA'
'dnr'
'estA'
'fabI'
'fha1'
'hcp1'
'hsiA2'
'hsiB2'
'hsiC2'
'hsiF2'
'icmF1'
'magA'
'magB'
'magC'
'magD'
'magE'
'magF'
'metG'
'mliC'
'mucE'
'mucR'
'muiA'
'pelA'
'pelB'
'pelC'
'pelD'
'pelE'
'pelF'
'ppkA'
'pppA'
'pslA'
'pslB'
'pslC'
'pslD'
'pslE'
'pslF'
'pslG'
'pslH'
'pslI'
'pslJ'
'rfaD'
'siaA'
'siaD'
'tRNA_Arg'
'tagF'
'tagL'
'tagQ'
'tagR'
'tagS'
'tagT'
'tse2'
'tsi2'
'tssA'
'tssB'
'tssC'
'tssJ'
'tssK'
'vgrG1'
'wbpM'
vgrG1'
fha1'
