# Supplementary material for: 131 保育における器楽活動に関する研究 : その実態と保育者の意識調査
Source: eLife journal article supplement (doi:10.7554/elife.05701), 2002-04-20
Supplement: figures [file elife-05701-figures-v2.pdf]

---

## Figures and figure supplements

Kin cell lysis is a danger signal that activates antibacterial pathways of *Pseudomonas aeruginosa*

**Michele LeRoux, et al.**

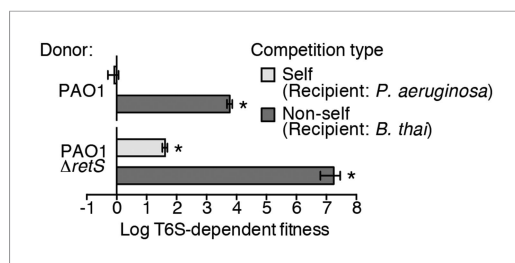

**Figure 1.** Wild-type *P. aeruginosa* cells display a strong T6S-dependent fitness advantage in co-culture with non-self but not self competitors. Outcome of growth competition experiments measuring fitness of *P. aeruginosa* PAO1 parental or  $\Delta retS$  strains in co-cultures with self or non-self recipients under T6SS-promoting conditions. The self recipient was *P. aeruginosa*  $\Delta tse1-4 \Delta tsi1-4$  in the strain background corresponding to the donor genotype (PAO1 or PAO1  $\Delta retS$ ). T6S-dependent fitness was parental donor competitive index (change [final/initial] in ratio of donor and recipient colony forming units [c.f.u.]) normalized to  $\Delta tssM1$  competitive index. Error bars represent  $\pm$ standard deviation (SD); n = 3 co-cultures. Asterisks denote a fitness advantage significantly >1 (p < 0.01).

DOI: [10.7554/eLife.05701.003](https://doi.org/10.7554/eLife.05701.003)

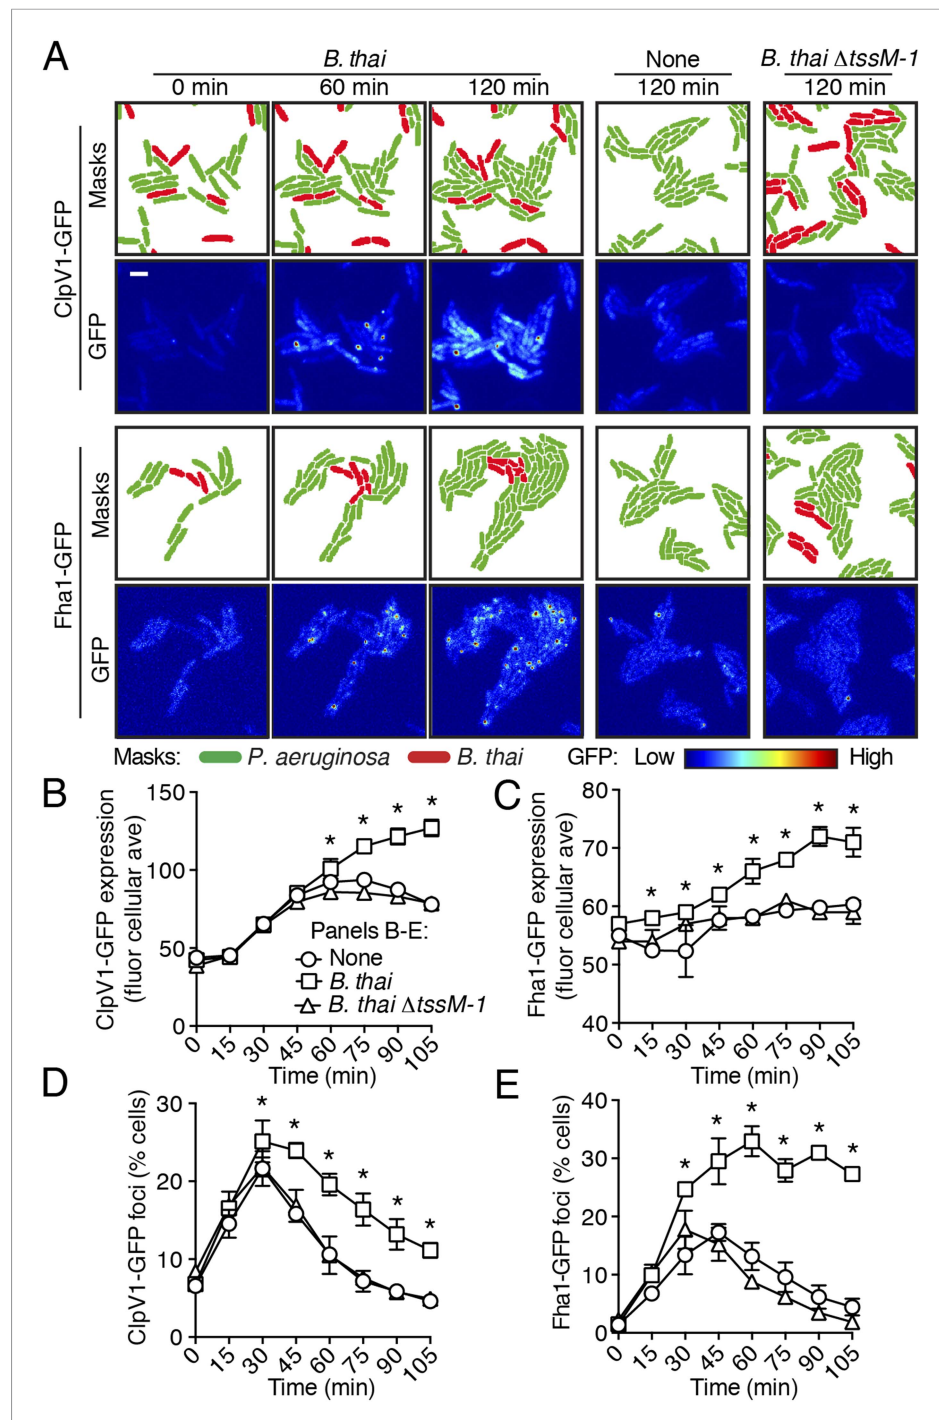

**Figure 2.** Non-self competitor bacteria stimulate expression and activity of the H1-T6SS. **(A)** H1-T6SS expression is increased in *P. aeruginosa* co-cultured with *B. thtai* expressing an active T6SS. Time-lapse fluorescence microscopy (TLFM) sequences of *P. aeruginosa* *clpV1-gfp* (upper) or *fha1-gfp* (lower) in monoculture or in co-culture with the indicated competitor. Cropped regions from representative time-points are displayed. Remaining time points for monoculture and co-culture with *B. thtai ΔtssM-1* are depicted in **Figure 2—figure supplement 1**; see also **Videos 1 and 2**. Masks colored by cell identity depict automated cell identification generated from the phase image. Scale bar, 6  $\mu$ m. **(B–C)** Quantification of H1-T6SS expression from the *P. aeruginosa* *clpV1-gfp* **(B)** and *fha1-gfp* **(C)** mono and co-culture TLFM experiments described in **(A)**. Average cellular GFP intensity for *P. aeruginosa* cells was calculated from background-subtracted images. **(D–E)** H1-T6SS activity is increased in the presence of *B. thtai* with an active T6SS. Percentage of *P. aeruginosa* *clpV1-gfp* **(D)** or *fha1-gfp* **(E)** cells with GFP foci for experiments described **Figure 2**. continued on next page

Figure 2. Continued

in (A). Error bars represent  $\pm$ SD;  $n = 3$  fields. Asterisks indicate significant differences when *B. thai* was present ( $p < 0.05$ ).

DOI: [10.7554/eLife.05701.004](https://doi.org/10.7554/eLife.05701.004)

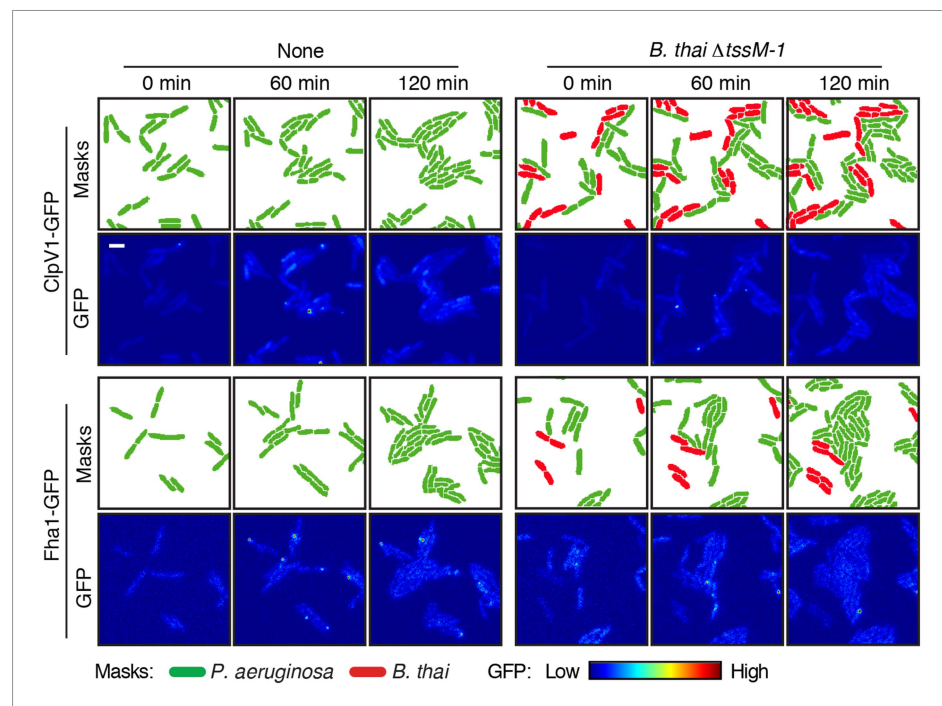

**Figure 2—figure supplement 1.** Competitors require an active T6SS to stimulate the *P. aeruginosa* H1-T6SS. TLFM sequences of *P. aeruginosa* *clpV1-gfp* (upper) and *fha1-gfp* (lower) cultivated either without competitor or with *B. thai*  $\Delta$ tssM-1 as depicted in **Figure 2A**. Scale bar, 6  $\mu$ m.

DOI: [10.7554/eLife.05701.005](https://doi.org/10.7554/eLife.05701.005)

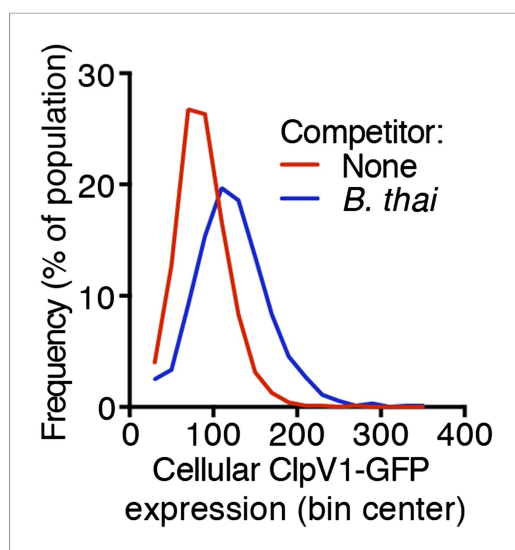

**Figure 2—figure supplement 2.** Increased H1-T6SS expression occurs throughout the population. Histograms of cellular ClpV1-GFP intensity of *P. aeruginosa* *clpV1-gfp* following 90 min of growth in monoculture or in co-culture with *B. thai*. Histograms bin size is 20 intensity units and is normalized to total cells.

DOI: [10.7554/eLife.05701.006](https://doi.org/10.7554/eLife.05701.006)

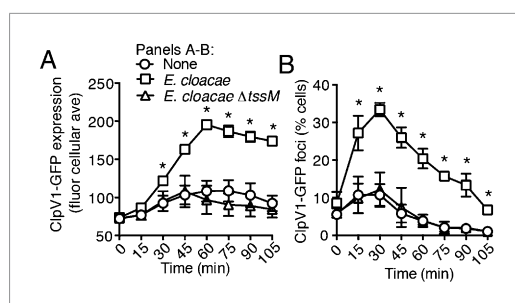

**Figure 2—figure supplement 3.** *E. cloacae* stimulates the H1-T6SS of *P. aeruginosa* in a T6S-dependent manner. Average cellular ClpV1-GFP expression (A) and the percentage of cells with ClpV1-GFP foci (B) of *P. aeruginosa* *clpV1-gfp* in monoculture or in co-culture with the indicated *E. cloacae* competitor. Data was collected and analyzed as described in **Figure 2**. Error bars represent  $\pm$ SD; n = 3 fields. Asterisks indicate significant differences when *B. thai* was present ( $p < 0.05$ ). See also **Video 3**.

DOI: [10.7554/eLife.05701.007](https://doi.org/10.7554/eLife.05701.007)

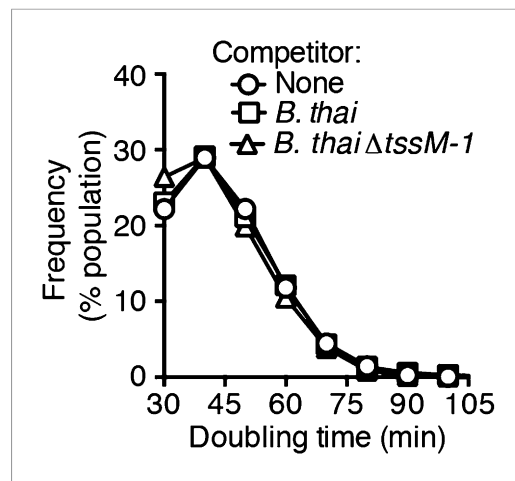

**Figure 2—figure supplement 4.** *P. aeruginosa* doubling time is not affected by the presence of *B. thai*. Histograms depicting *P. aeruginosa* doubling times during growth in monoculture or co-culture with *B. thai* under TLFM conditions. Error bars represent  $\pm$ SD; n = 3 fields.

DOI: [10.7554/eLife.05701.008](https://doi.org/10.7554/eLife.05701.008)

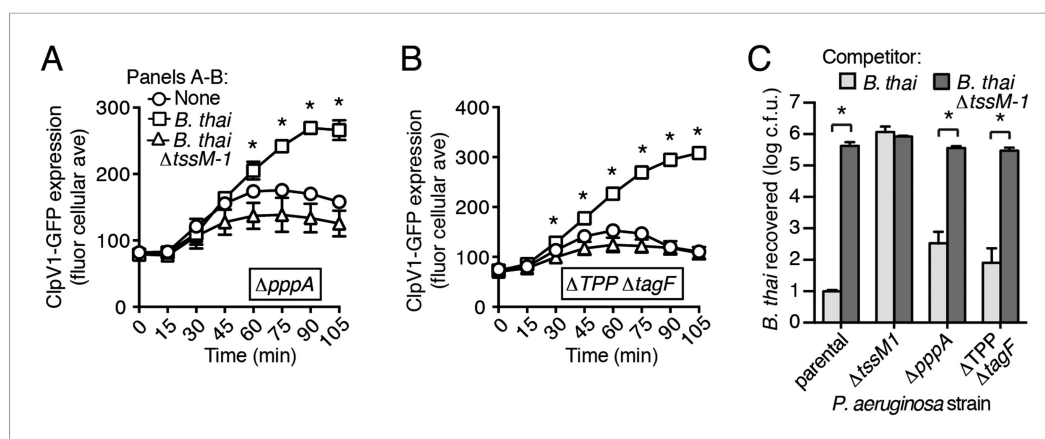

**Figure 3.** PARA does not require the TPP. (A–B) Increased H1-T6SS expression in the presence of *B. thtai* does not require a functional TPP. Average ClpV1-GFP cellular fluorescence intensity in *P. aeruginosa* *clpV1-gfp*  $\Delta pppA$  (A) and  $\Delta TPP \Delta tagF$  (B) backgrounds during monoculture or co-culture with the indicated competitors. Error bars represent  $\pm$ SD; n = 3 fields. Asterisks indicate significant differences when *B. thtai* was present ( $p < 0.05$ ). Corresponding H1-T6SS activity is shown in **Figure 3—figure supplement 1**. (C) The TPP is not required for preferential targeting of *B. thtai* with an active T6SS. Outcome of growth competition experiments measuring survival of *B. thtai* following co-culture with the indicated *P. aeruginosa* strain under T6SS-promoting conditions. Error bars represent  $\pm$ SD; n = 3 co-cultures.

DOI: [10.7554/eLife.05701.012](https://doi.org/10.7554/eLife.05701.012)

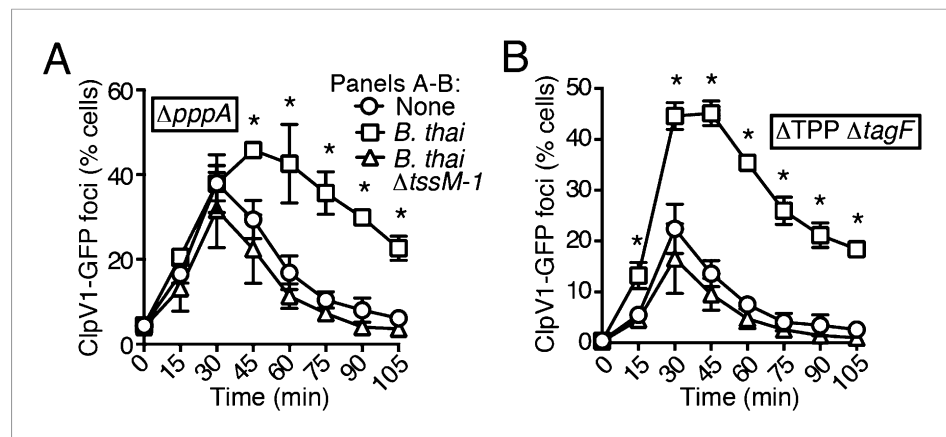

**Figure 3—figure supplement 1.** Elevated H1-T6SS activity in the presence of *B. thail* does not require the TPP. Percentage of cells containing ClpV1-GFP foci from *P. aeruginosa* *clpV1-gfp* strains of  $\Delta pppA$  (A) or  $\Delta TPP \Delta tagF$  (B) backgrounds in monoculture or in co-culture with the indicated competitor. Error bars represent  $\pm SD$ ;  $n = 3$  co-cultures. Asterisks indicate significant differences when *B. thail* was present ( $p < 0.05$ ).

DOI: [10.7554/eLife.05701.013](https://doi.org/10.7554/eLife.05701.013)



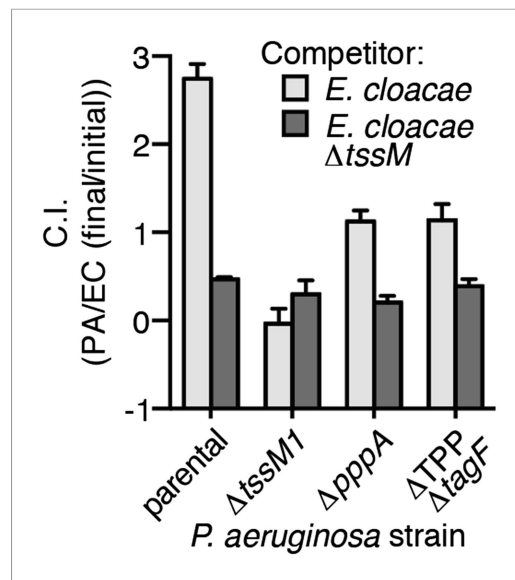

**Figure 3—figure supplement 2.** *P. aeruginosa* does not require the TPP to differentially target *E. cloacae* with a T6SS. Outcome of interspecies growth competition experiments measuring competitive index (C.I.) of *P. aeruginosa*–*E. cloacae* co-cultures grown under T6SS-promoting conditions. PA, *P. aeruginosa*; EC, *E. cloacae*. Error bars represent  $\pm$ SD; n = 3 co-cultures. DOI: [10.7554/eLife.05701.014](https://doi.org/10.7554/eLife.05701.014)

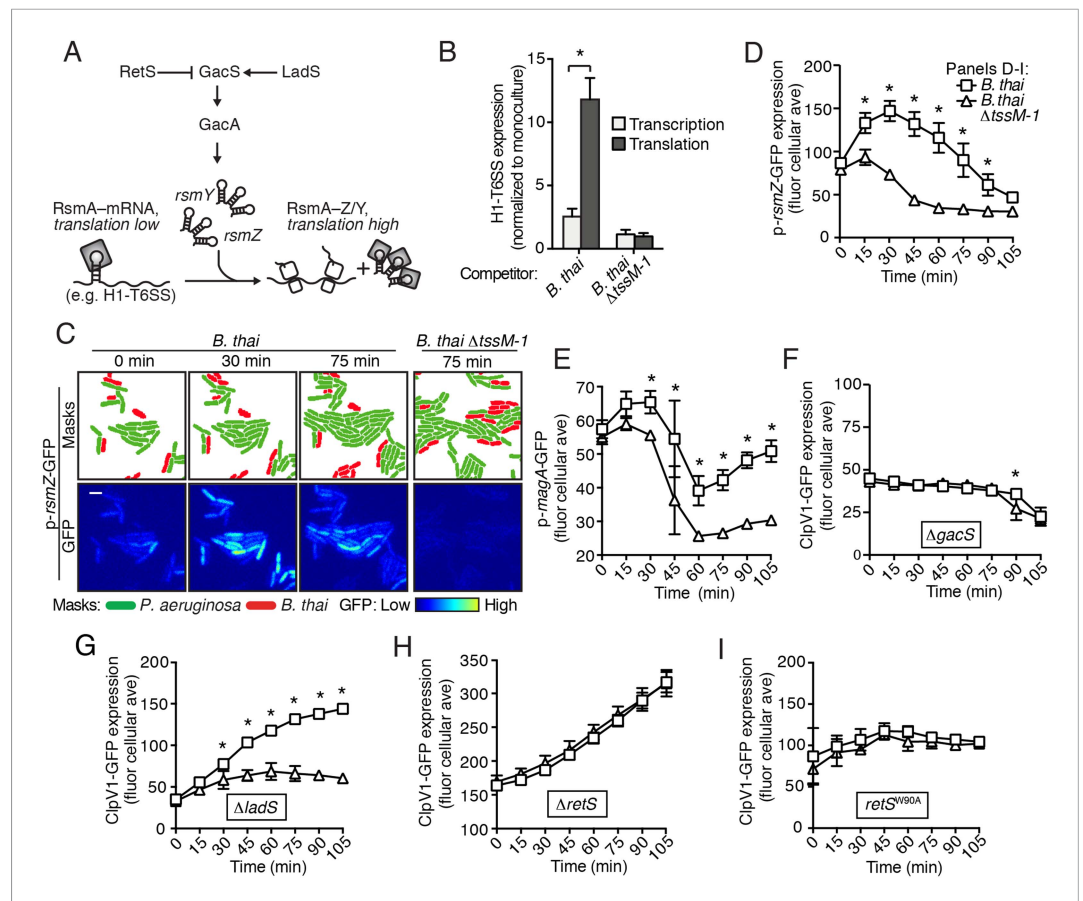

**Figure 4.** The Gac/Rsm pathway is required for PARA. **(A)** Schematic depicting the Gac/Rsm pathway of *P. aeruginosa*. The orphan sensor kinases RetS and LadS exert opposing activity on a third sensor kinase, GacS, which in turn activates its cognate response regulator, GacA. Once active, GacA promotes increased transcription of the small RNAs *rsmY* and *rsmZ*. These molecules bind and sequester RsmA; therefore, when abundant, they prevent RsmA binding and destabilization of target mRNAs, including H1-T6SS transcripts. **(B)** Elevated H1-T6SS expression in the presence of *B. thail* occurs primarily at the post-transcriptional level. *P. aeruginosa* strains bearing chromosomally encoded transcriptional or translational fusions to *tssA1* (Brencic and Lory, 2009) were incubated with the indicated competitor. Fold H1-T6SS increase in expression was determined by normalizing *P. aeruginosa* co-cultures to the corresponding strain cultivated in monoculture.  $n = 3$  co-cultures; asterisk indicates significant differences between translational and transcriptional activity ( $p < 0.05$ ). **(C)** *RsmZ* expression is elevated in the presence of *B. thail* containing a T6SS. Cells masks and the GFP fluorescence channel from representative TLFM sequences of the indicated *P. aeruginosa* p-rsmZ-gfp co-cultures. Additional time points are shown in **Figure 4—figure supplement 1**; see also **Video 4**. **(D)** Average cellular fluorescence intensity from *P. aeruginosa* of p-rsmZ-gfp corresponding to **(C)**. **(E)** Expression of MagA is elevated in the presence of T6SS<sup>BT</sup>. Average cellular GFP intensity for *P. aeruginosa* p-magA-gfp in co-culture with *B. thail* or *B. thail ΔtssM-1*. **(F)** GacS is required for H1-T6SS activation in response to T6SS<sup>BT</sup>. ClpV1-GFP expression was quantified for co-cultures of *P. aeruginosa ΔgacS clpV1-gfp* with the indicated *B. thail* competitor. **(G)** LadS is not required for elevated H1-T6SS expression in the presence of *B. thail*. Average cellular ClpV1-GFP intensity of *P. aeruginosa ΔladS clpV1-gfp* in co-culture with the indicated competitor. See **Figure 4—figure supplement 2A** for H1-T6SS activity. **(H)** *P. aeruginosa* cells lacking *retS* are unable to respond to T6SS<sup>BT</sup>. Average cellular ClpV1-GFP intensity of *P. aeruginosa ΔretS clpV1-gfp* in co-culture with the indicated competitor. See **Figure 4—figure supplement 2B** for H1-T6SS activity. **(I)** A conserved residue in the periplasmic domain of RetS is required for *P. aeruginosa* response to T6SS<sup>BT</sup>. Average cellular ClpV1-GFP intensity of *P. aeruginosa clpV1-gfp retS<sup>W90A</sup>* cultivated in the presence of the indicated competitor. See **Figure 4—figure supplement 2C** for H1-T6SS activity.  $n = 3$  fields; asterisks indicate significant differences when *B. thail* was present ( $p < 0.05$ ).

DOI: 10.7554/eLife.05701.015

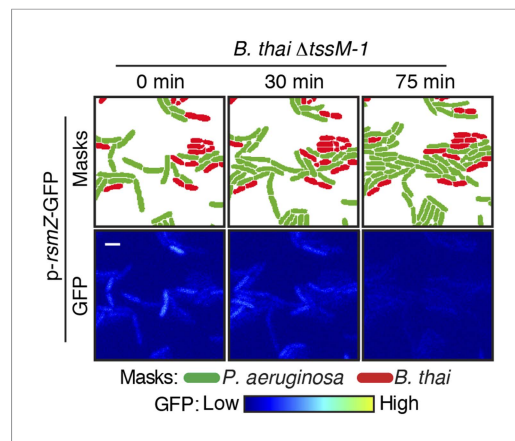

**Figure 4—figure supplement 1.** *RsmZ* expression is not stimulated by *B. thal* lacking an active T6SS. Representative TLFM sequences of *P. aeruginosa* *p-rsmZ-gfp* cultivated in co-culture with *B. thal*  $\Delta tssM-1$ .

DOI: [10.7554/eLife.05701.016](https://doi.org/10.7554/eLife.05701.016)

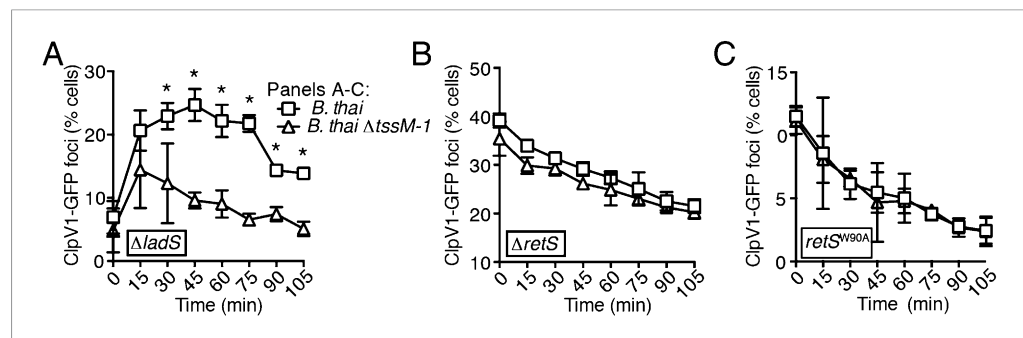

**Figure 4—figure supplement 2.** PARA-associated increases in H1-T6SS activity depend on RetS but not LadS. (A) LadS is not required for increased activity of the H1-T6SS in the presence of *B. thal*. Percentage of *P. aeruginosa* *clpV1-gfp*  $\Delta ladS$  cells with fluorescent foci during co-culture with the indicated *B. thal* strain. (B) Stimulation of H1-T6SS activity by *B. thal* requires RetS. Percentage of *P. aeruginosa* *clpV1-gfp*  $\Delta retS$  cells with fluorescent foci during co-culture with the indicated *B. thal* strain. (C) A putative signal-binding RetS mutant does not respond to the presence of *B. thal*. Percentage of *P. aeruginosa* *clpV1-gfp* *retS*<sup>W90A</sup> cells with fluorescent foci during co-culture with the indicated *B. thal* strain. Error bars represent  $\pm$ SD; n = 3 co-cultures. Asterisks indicate significant differences when *B. thal* was present ( $p < 0.05$ ).

DOI: [10.7554/eLife.05701.017](https://doi.org/10.7554/eLife.05701.017)

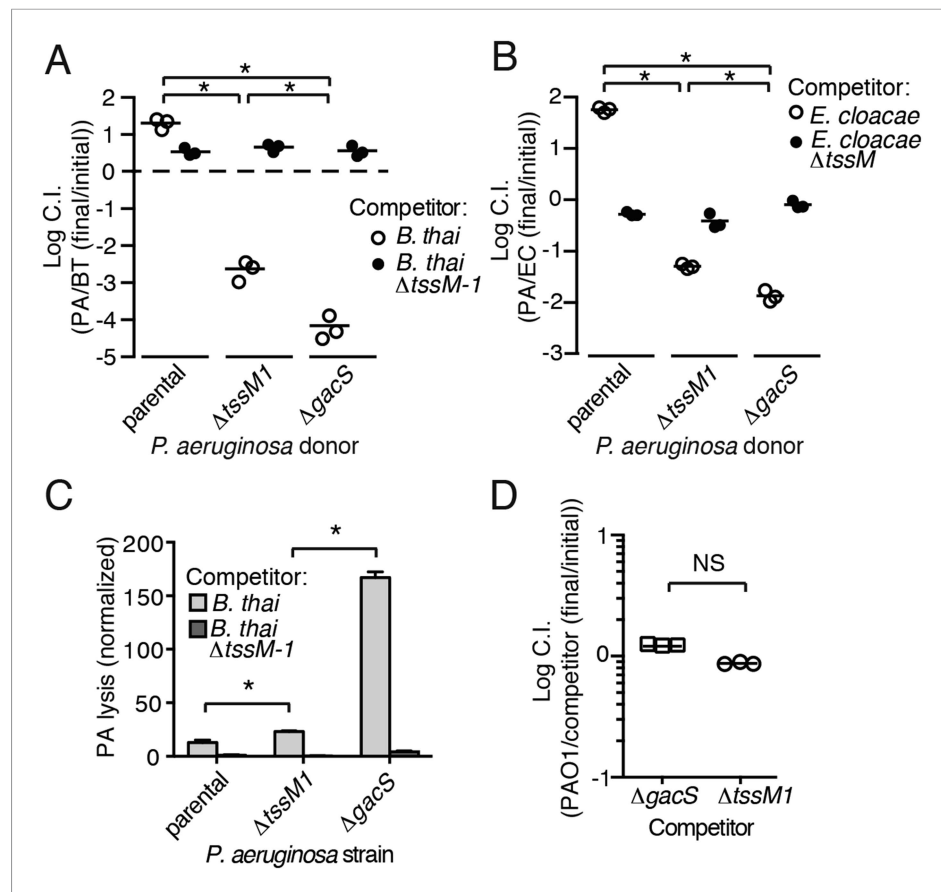

**Figure 5.** Disruption of the Gac/Rsm pathway results in a profound fitness defect in interspecies co-culture. (A–B) A *P. aeruginosa* strain with an inactivated Gac/Rsm pathway displays fitness defects beyond a strain lacking H1-T6S. Outcome of interspecies growth competition experiments between the indicated *P. aeruginosa* and *B. thal* (A) or *E. cloacae* (B) strains.  $n = 3$  co-cultures. C.I., competitive index. PA, *P. aeruginosa*. BT, *B. thal*. EC, *E. cloacae*. (C) *P. aeruginosa* lysis promoted by T6S<sup>BT</sup> is increased in a strain lacking a functional Gac/Rsm pathway. *P. aeruginosa* lysis events from TLFM sequences were normalized to initial number of contacts with *B. thal*. See also **Video 5**.  $n = 3$  fields. (D) A *gacS* deletion strain does not alter growth rate. Outcome of intraspecies growth competition experiments between PAO1 and the indicated competitor strains under conditions identical to those used in (A–B).  $n = 3$  co-cultures. (A–D) Error bars represent  $\pm$ SD; asterisks indicate significant differences between indicated groups ( $p < 0.05$ ). NS, not significant.

DOI: [10.7554/eLife.05701.019](https://doi.org/10.7554/eLife.05701.019)

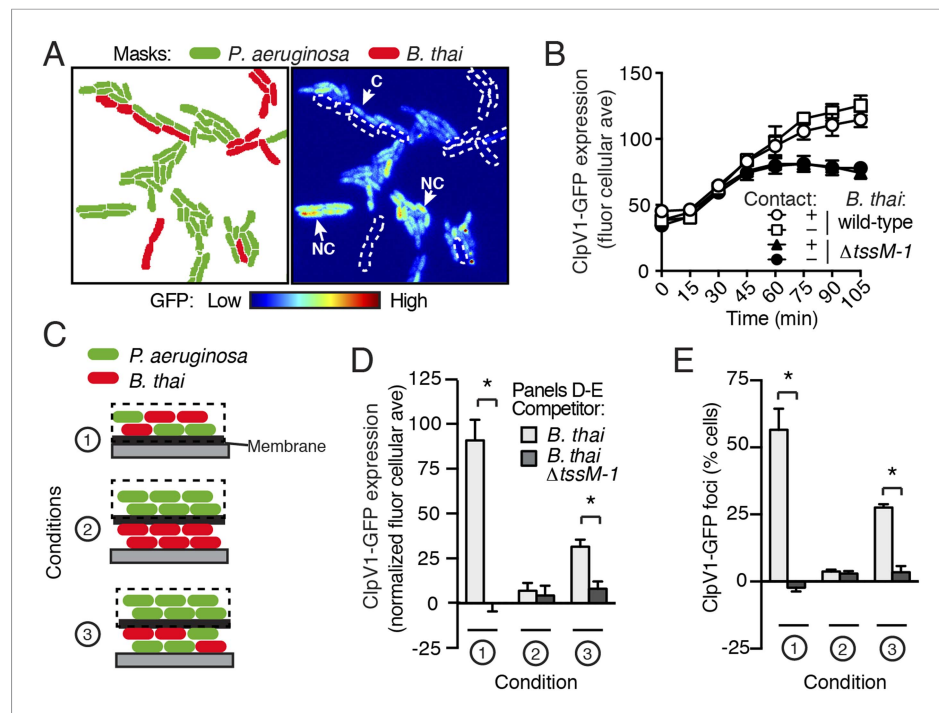

**Figure 6.** PARA is induced by a diffusible signal. **(A)** The PARA-associated increase in H1-T6SS expression is not contact-dependent. A representative region from a *P. aeruginosa* *clpV1-gfp*–*B. thal* co-culture following 120 min of growth is depicted. Cells masks are colored by cell identity (left panel); GFP intensity with *B. thal* cell positions outlined in white dashed lines (right panel). Arrows indicate *P. aeruginosa* cells contacting (C) or not contacting (NC) *B. thal*. **(B)** Average cellular ClpV1-GFP expression for contacting and non-contacting subpopulations described in **(A)**. **(C)** Schematic depicting the experimental setup for **(D)**. **(D–E)** PARA induction requires proximity to contacting *P. aeruginosa*–*B. thal* cells. Bacterial growth was initiated as pictured in **(C)**. ClpV1-GFP was measured in populations on the membrane (black dashed lines). Average cellular ClpV1-GFP expression **(D)** and percentage of cells with foci **(E)** was determined. ClpV1-GFP expression measured in co-cultures was normalized by subtracting *P. aeruginosa* monoculture measurements. Error bars represent  $\pm$ SD;  $n = 3$  fields. Asterisks indicate significant differences between indicated groups ( $p < 0.05$ ).

DOI: [10.7554/eLife.05701.021](https://doi.org/10.7554/eLife.05701.021)

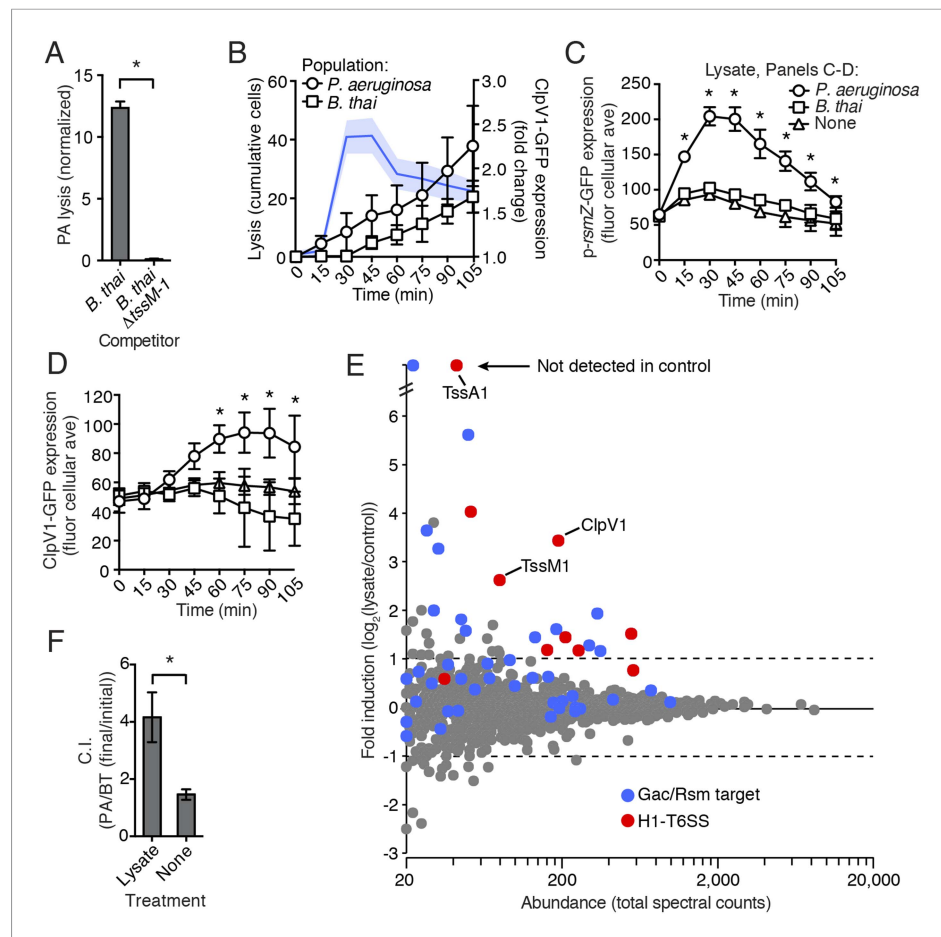

**Figure 7.** *P. aeruginosa* lysis is sufficient to induce PARA. **(A)** T6S<sup>BT</sup> promotes *P. aeruginosa* lysis. Lysis of *P. aeruginosa* was measured under TLFM conditions and data were normalized to contacts with *B. thal*.  $n = 3$  fields. Asterisk indicates significant difference between *B. thal* and *B. thal*  $\Delta tssM-1$  ( $p < 0.05$ ). **(B)** *P. aeruginosa* lysis precedes induction of H1-T6SS expression and *B. thal* lysis. Lysis (left axis) and fold increase in ClpV1-GFP (blue line, right axis) measured concurrently under TLFM conditions. ClpV1-GFP levels from *P. aeruginosa*–*B. thal* co-culture were normalized to *P. aeruginosa* monoculture. Error bars and light blue shading,  $\pm$  SD.  $n = 4$  fields. See also **Video 6**. **(C)** *P. aeruginosa* lysate stimulates the Gac/Rsm pathway. Average cellular p-rsmZ-GFP expression in *P. aeruginosa* cultivated on lysate-infused growth pads. Cellular GFP expression was calculated as described in **Figure 2**. **(D)** H1-T6SS expression is stimulated by *P. aeruginosa* lysate. Average cellular ClpV1-GFP expression of *P. aeruginosa* cultivated on lysate-infused growth pads. Corresponding H1-T6SS activity is shown in Figure 7—figure supplement 1. **(C–D)**  $n = 3$  fields; asterisks indicated significant differences between *P. aeruginosa* lysate and no lysate ( $p < 0.05$ ). **(E)** Expression of Gac/Rsm-regulated proteins is increased in lysate-treated *P. aeruginosa* cells. Quantitative mass spectrometry was used to compare the proteome of PBS (control) and lysate treated *P. aeruginosa*. Previously identified Gac/Rsm targets are indicated and H1-T6SS proteins discussed in this study are labeled. Data derive from two biological replicates. **(F)** Lysate stimulates H1-T6SS-mediated killing of *B. thal*  $\Delta tssM-1$ . Outcome of interspecies growth competition experiments between the indicated *P. aeruginosa* and *B. thal* in the presence or absence of *P. aeruginosa*-derived lysate. Error bars represent  $\pm$ SD;  $n = 3$  co-cultures. Asterisk indicates significant difference between lysate and no lysate treatments ( $p < 0.05$ ).

DOI: [10.7554/eLife.05701.022](https://doi.org/10.7554/eLife.05701.022)

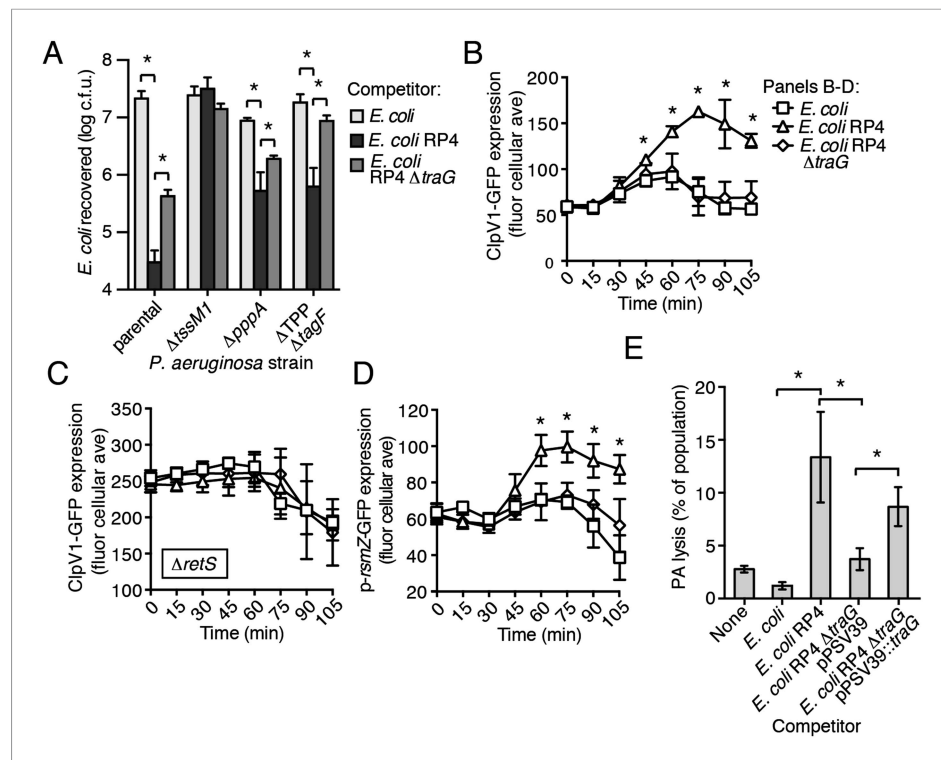

**Figure 8.** The RP4-encoded IncP-type T4SS induces PARA through lysis of *P. aeruginosa*. **(A)** The TPP is not required to differentially target *E. coli* with a T4SS. Outcome of growth competition experiments demonstrating increased susceptibility of T4S<sup>+</sup> *E. coli* to the H1-T6SS of *P. aeruginosa*. See also **Figure 8—figure supplement 1** for genetic complementation data of the *traG* deletion.  $n = 4$  co-cultures. **(B)** H1-T6SS expression is elevated in the presence of *E. coli* containing a T4SS. Average cellular ClpV1-GFP expression of the *P. aeruginosa* *clpV1-gfp* throughout co-culture with the indicated *E. coli* strains. **(C)** RetS is required for increased H1-T6SS expression. Average cellular ClpV1-GFP expression of the *P. aeruginosa* *clpV1-gfp*  $\Delta$ retS throughout co-culture with the indicated *E. coli* strains. **(D)** *E. coli* bearing a T4SS stimulates *rsmZ* expression. Average cellular GFP levels of *P. aeruginosa* *p-rsmZ-gfp* in TLFM co-culture experiments with the indicated *E. coli* strains. **(B–D)**  $n = 3$  fields; asterisks indicate significant differences between *E. coli* and *E. coli* RP4 co-cultures ( $p < 0.05$ ). **(E)** The T4SS encoded on RP4 promotes *P. aeruginosa* lysis. Relative *P. aeruginosa* *attB::lacZ* lysis was measured following co-cultivation with the indicated *E. coli* strain by comparing extracellular to total  $\beta$ -galactosidase activity. Error bars represent  $\pm$ SD; **(A)** and **(E)**  $n = 3$  co-cultures; asterisks indicate significant differences between indicated groups ( $p < 0.05$ ).

DOI: [10.7554/eLife.05701.025](https://doi.org/10.7554/eLife.05701.025)

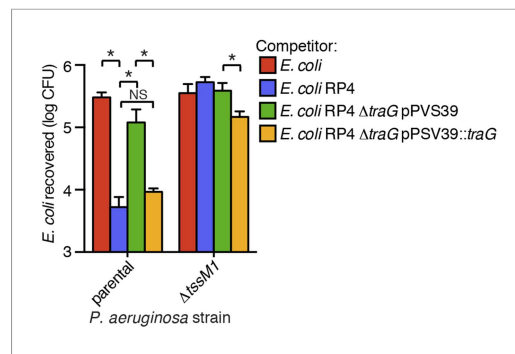

**Figure 8—figure supplement 1.** Genetic complementation of *traG* restores H1-T6SS-dependent targeting of *E. coli* RP4. Outcome of growth competition experiment in which *P. aeruginosa* and *E. coli* were co-cultivated under T6SS-promoting conditions.  $n = 4$  co-cultures. Asterisks indicates significant differences between groups ( $p < 0.05$ ); NS, not significant.

DOI: [10.7554/eLife.05701.026](https://doi.org/10.7554/eLife.05701.026)



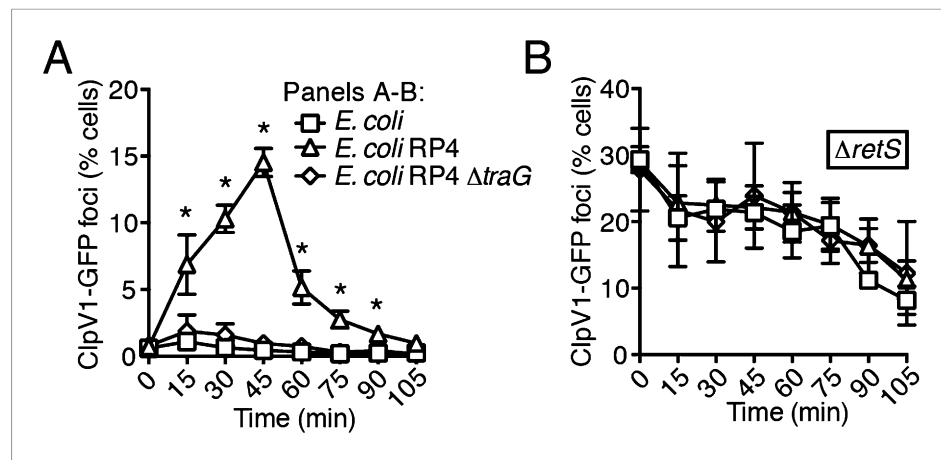

**Figure 8—figure supplement 2.** The RP4-encoded T4SS induces a PARA-associated increase in H1-T6SS activity. Percentage of cells containing ClpV1-GFP foci by a *P. aeruginosa* *clpV1-gfp* strain cultivated with the indicated competitor. Error bars represent  $\pm$ SD;  $n = 3$  co-cultures. Asterisks indicate significant differences between co-cultures with *E. coli* and *E. coli* RP4 ( $p < 0.05$ ).

DOI: [10.7554/eLife.05701.027](https://doi.org/10.7554/eLife.05701.027)

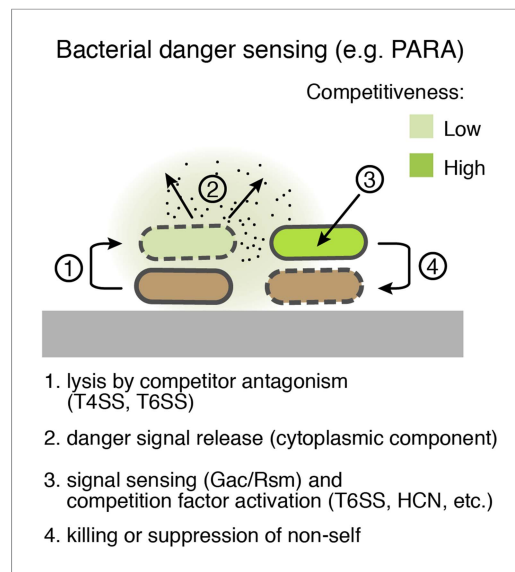

**Figure 9.** Bacterial danger sensing. The model depicts antagonism between two species of bacteria, represented in green and brown. The green cells possess a danger sensing pathway; specifics of PARA are provided in parentheses.

DOI: [10.7554/eLife.05701.028](https://doi.org/10.7554/eLife.05701.028)
